1 **A negative feedback loop between Insulin-like Growth Factor signaling and the lncRNA**

2 **SNHG7 tightly regulates transcript levels and proliferation**

3 David N. Boone,<sup>1,2,3</sup> Andrew Warburton,<sup>3,4</sup> Sreeroopa Som,<sup>3,5</sup> and Adrian V. Lee<sup>1,6,7</sup>

4 <sup>1</sup>Women's Cancer Research Center

5 <sup>2</sup>Department of Biomedical Informatics, University of Pittsburgh

6 <sup>3</sup>University of Pittsburgh Cancer Institute Academy/Computer Science, Biology, and Biomedical  
7 Informatics Academy

8 <sup>4</sup>Icahn School of Medicine at Mount Sinai

9 <sup>5</sup>Stanford University

10 <sup>6</sup>Department of Pharmacology and Chemical Biology, University of Pittsburgh

11 <sup>7</sup>University of Pittsburgh Cancer Institute

12

13 Corresponding Author:

14 David N. Boone

15 The Offices at Baum, Suite 414

16 5607 Baum Blvd.

17 Pittsburgh, PA 15206

18 412-648-7231

19 [dnb14@pitt.edu](mailto:dnb14@pitt.edu)

20

21 **Classification:** Biological Sciences – Cell Biology and Systems Biology

22 **Keywords:** Long non-coding RNAs, Insulin-like Growth Factor, Breast Cancer, Proliferation,

23 SNHG7

24

25 **Running Title:** SNHG7/IGF feedback loop regulates proliferation

26

27 **ABSTRACT**

28 Evidence suggests Insulin-like growth factor 1 (IGF1) signaling is involved in the initiation and  
29 progression of a subset of breast cancers by inducing cell proliferation and survival(1,2).  
30 Although the signaling cascade following IGF1 receptor activation is well-studied(3,4), the key  
31 elements of the transcriptional response governing IGF1's actions are not well understood.  
32 Recent studies reveal that the majority of the genome is transcribed and that there are more  
33 long non-coding RNAs (lncRNAs) than protein coding genes(5), several of which are  
34 dysregulated in human cancer(6,7). However, studies on the regulation and mechanism of action  
35 of these lncRNAs are in their infancy. Here we show that IGF1 alters the expression levels of a  
36 subset of lncRNAs. SNHG7, a member of the small nucleolar host gene family, is a highly-  
37 expressed lncRNA that is consistently and significantly down-regulated by IGF1 signaling by a  
38 post-transcriptional mechanism through the MAPK pathway. SNHG7 regulates proliferation of  
39 breast cancer cell lines in a dose-dependent manner, and silencing SNHG7 expression causes  
40 cell cycle arrest in G0/G1. Intriguingly, SNHG7 alters the expression of many IGF1 signaling  
41 intermediates and IGF1-regulated genes suggesting a feedback mechanism to tightly regulate  
42 the IGF1 response. Finally, we show with TCGA data that SNHG7 is overexpressed in tumors of  
43 a subset of breast cancer patients and that these patients have lower disease-free survival than  
44 patients without elevated SNHG7 expression. We propose that SNHG7 is a lncRNA oncogene  
45 that is controlled by growth factor signaling in a feedback mechanism to prevent  
46 hyperproliferation, and that this regulation can be lost in the development or progression of  
47 breast cancer.

48

49

50

51

52 **SIGNIFICANCE STATEMENT**

53 IGF1 signaling drives proliferation and survival and is important for the initiation and  
54 development of a subset of breast cancers. IGF1 is known to control the expression of  
55 thousands of protein coding genes, but it is unknown if it alters the expression of other gene  
56 types, such as long noncoding RNAs. Here we demonstrate that IGF regulates lncRNAs  
57 including the mostly unstudied SNHG7. We further show that SNHG7 is necessary for  
58 proliferation and modulates IGF1 signaling through a novel feedback mechanism that is  
59 required for fine-tuning of the transcriptional response to growth factor signaling and  
60 proliferation of breast cancer cells. SNHG7 is highly expressed in a subset of breast cancer  
61 patients with poor prognosis giving further credence that it is a novel oncogene.

62

63 **INTRODUCTION:**

64 Substantial evidence implicates IGF1 signaling in the initiation and development of a  
65 number of cancers including breast cancer (4). The signaling initiated by IGF1 binding to IGF1R,  
66 a receptor tyrosine kinase, is well known. IGF1R activation induces a phosphorylation cascade  
67 through IRS1 and IRS2, which stimulates the MAPK and PI3K/AKT pathways(3). Ultimately,  
68 IGF1 signaling leads to a robust and temporal transcriptional response(8,9)—10% of all protein  
69 coding genes(9)—and an array of biological processes including cell proliferation and  
70 survival(10). While the signaling and biological responses elicited by IGF are well-known, the  
71 IGF-regulated genes and the molecular mechanisms that govern those biological responses are  
72 largely unclear. Furthermore, there has not been a comprehensive examination of IGF1-induced  
73 transcriptome changes using RNA sequencing. This is critical given that IGF regulates a vast  
74 number of protein coding genes and recent large-scale omics studies including ENCODE  
75 demonstrate that there are more non-coding transcripts than coding(5,11,12).

76 Long non-coding RNAs (lncRNAs) are a diverse class of RNA molecules that are loosely  
77 defined by an arbitrary length of greater than 200 nucleotides and the apparent lack of protein  
78 coding potential(13–17). The number of lncRNAs, although debated in the literature, at least  
79 rivals the number of protein coding genes. While the vast majority were recently identified and  
80 do not have a known function, several lncRNAs including XIST(18–20), HOTAIR(7), and  
81 H19(21,22), have been studied for decades. From those and recent studies, it is evident that  
82 lncRNAs are important regulators of a variety of cellular processes including transcriptional  
83 regulation, chromatin structure, RNA stability, and cell proliferation through a variety of novel  
84 mechanisms that often are due to the ability of lncRNAs to bind to DNA, RNA, and proteins and  
85 act as guides, scaffolds, and decoys(23). Further, the dysregulation of lncRNAs is implicated in  
86 the development and progression of many diseases including breast cancer(6,7,13,24–29).  
87 Therefore, it is imperative to identify and characterize the regulation and functional significance

88 of novel lncRNAs to understand basic biological processes and the pathogenesis and treatment  
89 of diseases such as breast cancer.

90         There has not been a comprehensive examination of regulation of lncRNAs by IGF1, but  
91 IGF/Insulin signaling represses the expression of CRNDE(30), a lncRNA highly expressed in  
92 colorectal cancer and gliomas(31,32). In this report we aimed to further understand the  
93 molecular mechanisms of the biological functions of IGF1 and to leverage the extensive  
94 knowledge of IGF1 as a model system to identify and characterize growth factor regulated  
95 lncRNAs that are functionally critical lncRNAs in breast cancer. Here, we demonstrate through  
96 whole transcriptome RNAseq that IGF1 signaling regulates a subset of lncRNAs that are altered  
97 in breast cancer. Further, we show that the known but unstudied lncRNA, SNHG7, which is  
98 amplified or overexpressed in ~5% of breast tumors in TCGA, is downregulated by IGF through  
99 a post-transcriptional mechanism through MAPK and controls proliferation in a dose-dependent  
100 manner. SNHG7, in part, tightly controls proliferation by altering mRNA levels of both IGF1  
101 signaling intermediates and downstream IGF1 regulated genes. Thereby, we identified a novel  
102 fine-tuning feedback mechanism of growth factor induced proliferation and gene expression  
103 response that is disrupted in the tumors of a subset of breast cancer patients.

104

## 105 **RESULTS**

### 106 **IGF regulates lncRNAs that are dysregulated in breast cancer**

107           The MCF7 cell line is a model breast cancer cell line that is robustly responsive to IGF1.  
108       Addition of IGF1 to serum deprived MCF7 cells leads to rapid activation of AKT/PI3K and MAPK  
109       pathways, expression changes of 1000s of genes, and proliferation (9). To identify lncRNAs  
110       regulated by IGF1 signaling that may be critical for proliferation of breast cancer cells, we  
111       examined the transcriptional response induced by the addition of IGF1 to serum starved MCF7  
112       cells after 3 and 8hrs using whole transcriptome RNAseq. The Tuxedo package(33) was used  
113       for transcriptome assembly and differential gene expression analysis. The reads were aligned  
114       and transcriptomes assembled using the GRCh38 genome build with all annotated Gencode  
115       v21(34) transcripts allowing for novel transcript detection. Additionally, reads that mapped to  
116       tRNAs, snoRNAs, miRNAs, and rRNAs were masked during transcript assembly to ensure  
117       proper expression calls of lncRNAs that are 'hosts' for small noncoding RNAs (Fig. 1A). When  
118       small ncRNA reads were not removed, expression of host lncRNA genes were often  
119       miscalculated because of the abundant reads of the small ncRNAs that are present in their  
120       introns, but are not part of the mature lncRNA (data not shown). IGF1 signaling significantly  
121       ( $q < 0.05$ ) induced a greater than 1.5-fold change in 1067 and 2061 annotated (Gencode v.21)  
122       genes at 3 and 8 hrs respectively (Fig. S1A-B; Supplementary Table 1). Individual gene  
123       expression changes were validated by qPCR in the same, and in an independent set of RNA  
124       (Fig. S1C). The global changes in gene expression observed correlated with the changes  
125       shown by expression microarray in our previous study(9) (data not shown). Also, as expected,  
126       pathway analysis of IGF1-regulated genes at 3 and 8hrs ( $FDR < 0.05$ ;  $FC > 2.0$ ) revealed that  
127       these transcripts were involved in activation of proliferation, survival, and cancer development,  
128       as well as, inhibition of cell death (Fig. S1D). Collectively, the qPCR and pathway analyses  
129       demonstrate the quality and validity of the RNA-seq data.

130 To determine if any of the differentially expressed genes were lncRNAs, we used a  
131 conservative approach of extracting any IGF-regulated gene that was annotated as a lncRNA in  
132 Gencode v.21 that was not merged with a protein coding gene during transcript assembly (Fig.  
133 1A) thus excluding many highly-overlapping antisense lncRNAs that were not properly aligned  
134 due to the use of an unstranded RNAseq library. This revealed that the expressions of 225  
135 previously annotated lncRNAs with a minimum fpkm of 1 at either 3 or 8hrs were significantly  
136 altered by IGF1 treatment at 3 or 8hrs with nearly an equal number upregulated as  
137 downregulated (Fig. 1B; Supplementary Table 2). Consistent with mRNA regulation by IGF in  
138 this and our previous study, slightly more were significantly regulated at 8hrs than 3hrs (Fig.  
139 1C). The expression of 65 annotated lncRNAs changed at both 3 and 8hrs suggesting early and  
140 sustained control by IGF1 signaling (Fig. 1C). To identify cancer relevant, IGF-induced  
141 lncRNAs, we sought to examine the alteration of these lncRNAs in The Cancer Genome Atlas  
142 (TCGA) breast cancer data (<http://cancergenome.nih.gov/>). Of the 65 lncRNAs only 12 had a  
143 "KNOWN" gene status by GENCODE meaning the annotation is identical to a known and  
144 curated gene in Entrez and is reported in TCGA. Examination of the 12 lncRNAs in the TCGA  
145 breast cancer data through the cBIO portal(35,36) revealed that 11 of them have copy number  
146 or gene expression alterations in a subset of breast cancer patients (Table 1). Interestingly, the  
147 dysregulation of one lncRNA, SNHG7, is enriched in a patient population with a poorer  
148 prognosis. SNHG7 is altered in ~5% of all breast cancer tumors in TCGA (70 of 1105 samples;  
149 67 overexpressed or amplified). Patients with overexpressed or amplified SNHG7 had a  
150 statistically significant poorer disease-free survival (Fig. 1D and Table 1; logrank test p-  
151 value=0.0139; N=7 of 45 with altered SNHG7 relapsed vs. 61 of 866). This demonstrates that  
152 SNHG7 is potentially translationally relevant and was selected for further study. In addition,  
153 analysis of gene expression data extracted for all TCGA breast cancer samples demonstrates  
154 that the expression of many of the 12 IGF-regulated lncRNAs are significantly enriched in a  
155 specific molecular subtype of breast cancer (Fig. 1E). For example, SNHG15 is significantly

156 enriched in the basal subtype (Fig. 1E and Fig. S2A-B). The regulation of SNHG7 and SNHG15  
157 by IGF1 was confirmed with qPCR (Fig. 1F).

158

### 159 **SNHG7 is downregulated post transcriptionally by IGF via the MAPK pathway**

160 Because SNHG7 is highly expressed, robustly regulated by IGF1 signaling, and is  
161 altered in a subset of breast cancer patients that correlate with survival, it was investigated  
162 further. SNHG7 is a relatively understudied lncRNA and is a snoRNA Host Gene (SNHG).  
163 SNHGs are highly structured genes (noncoding or protein coding) that have snoRNAs that are  
164 spliced and processed from their introns after they are transcribed, often resulting in two  
165 functional RNA species—1) snoRNAs and 2) mRNAs or lncRNAs. For example, the well-  
166 characterized tumor suppressor lncRNA GAS5, which is down-regulated in breast cancer, is a  
167 SNHG that has multiple snoRNAs that are processed from its introns. The snoRNAs are  
168 functional, but it is the mature GAS5 lncRNA that controls apoptosis by regulating glucocorticoid  
169 receptor signaling(24).

170 SNORA43 and SNORA17 are the snoRNAs expressed in two of the introns of SNHG7  
171 (Fig. 2A and S3A). After the snoRNAs are spliced out of the primary SNHG7 transcript they are  
172 further processed to become functional snoRNAs. However, the mature SNHG7 transcript is  
173 conserved among primates (Fig. S3A), highly and ubiquitously expressed (Fig. S3B), unlikely to  
174 encode for a protein as indicated by low PhyloCSF(37) (negative for all 6 frames) and  
175 txCDSpredict (576.00) scores (both visualized in UCSC Genome Browser), and is predicted to  
176 be highly structured (Fig. S3C) suggesting it is noncoding and has biological functions  
177 independent of the snoRNAs. Both 5' and 3' Rapid Amplification of cDNA Ends (RACE)  
178 confirmed that there are at least two main REFseq annotated isoforms expressed in MCF7 cells  
179 that differ by one intron (Fig. 2A and Fig. S3A red and blue and S3D). In this report, the 5 exon,  
180 4 intron isoform is referred to as SNHG7-I (Fig. S3A red) and the 4 exon, 3 intron isoform is  
181 referred to as SNHG7-NI (Fig. S3A blue). The 3<sup>rd</sup> RefSeq SNHG7 isoform (Fig. S3A no color)



182 was not detected by RACE. Subcellular fractionation followed by qPCR demonstrates SNHG7 is  
183 predominantly expressed in the cytoplasm (Fig. 2B).

184 To test the kinetic regulation of SNHG7 by IGF1, MCF7 cells were treated with IGF1 for  
185 various lengths of time. The expression of SNHG7 is significantly and continuously down-  
186 regulated by IGF1 signaling for 24hrs (Fig. 2C). MCF7 cells were also treated with an IGF1R  
187 kinase inhibitor (BMS-754807) and the expression of SNHG7 increased, further implicating that  
188 the expression of SNHG7 is tightly regulated by IGF1 signaling (Fig. 2D). This regulation is not  
189 unique to MCF7 cells as SNHG7 is also regulated by IGF1 in the immortalized but non-  
190 transformed MCF10A cells (Fig. 2E). Additionally, there is a significant negative correlation ( $r=-$   
191  $0.2727$ ;  $p<0.05$ ) between RNA levels of SNHG7 and IGF1R (Fig. 2F) as determined by RNAseq  
192 data published for a set of 56 breast cancer cell lines(38) reanalyzed through the pipeline  
193 described above, suggesting the regulation of SNHG7 by IGF signaling is common in breast  
194 cancer cell lines.

195 While mature SNHG7 is downregulated by IGF1 signaling, the snoRNAs contained  
196 within the introns of SNHG7 are not significantly reduced (Fig. 2G), suggesting post-  
197 transcriptional regulation of mature SNHG7 instead of transcriptional regulation of the primary  
198 transcript. To determine if this is the case, serum starved MCF7 cells were treated with  
199 Actinomycin D before addition of IGF1 or vehicle. The inhibition of transcription did not ablate  
200 the reduction of SNHG7 expression by IGF1 (Fig. 2H) suggesting that IGF1 alters SNHG7  
201 expression by reducing the stability of the transcript and not through transcriptional repression.  
202 The reduction of SNHG7 levels after Actinomycin treatment (Fig. 2H DMSO/Ctl vs.  
203 Actinomycin/Ctl) demonstrates transcription was effectively inhibited. Combined, these results  
204 suggest that the regulation of the mature transcript is not merely a mechanism to change the  
205 expression of the snoRNAs in the introns, but rather a tight regulation of the levels of the mature  
206 SNHG7 lncRNA.

207 SNHG7 is a 5'terminal oligopyrimidine (5'TOP) gene similar to Gas5. It is known that

208 Gas5 lncRNA levels and other 5'TOP genes are destabilized by translation(39). Given that IGF1  
209 signaling regulates translation, we tested if IGF1 regulates SNHG7 levels through translation.  
210 Surprisingly, we observed that inhibition of translation with cycloheximide did not prevent IGF1  
211 from decreasing the levels of SNHG7 (Fig. 2I), so we examined the effects of signaling  
212 intermediates. Two of the primary downstream signaling pathways of IGF1R are  
213 PI3K/AKT/mTOR and MAPK. Small molecule inhibitors of PI3K, MEK, and mTOR were used to  
214 examine how IGF1 alters the stability of SNHG7. Inhibition of PI3K and mTOR had little effect  
215 on IGF1's control of SNHG7 levels, while inhibition of MEK fully prevented alterations of SNHG7  
216 levels by IGF1 signaling in serum starved MCF7 cells (Fig. 2I) indicating MEK signaling in the  
217 destabilization of SNHG7. Collectively, these results (Fig 2) suggest a novel mechanism  
218 whereby IGF1 significantly down-regulates the expression of SNHG7 through posttranscriptional  
219 alteration of SNHG7 mature RNA stability via the MAPK pathway.

220

### 221 **SNHG7 is necessary and sufficient for breast cancer cell proliferation**

222 IGF1 signaling regulates proliferation of breast cancer cells. To determine if SNHG7 has  
223 similar effects, we examined the response of proliferation to altered SNHG7 levels. A pool of  
224 independently designed siRNA duplexes significantly reduced mature SNHG7 expression  
225 without altering the expression of the snoRNAs hosted in the introns (Fig. 3A). The proliferation  
226 of MCF7 cells with reduced SNHG7 expression was drastically reduced as scored by both a  
227 fluorometric assay measuring DNA content (Fig. 3B) and by counting cells with a  
228 hemacytometer using trypan blue exclusion (Fig. S4A-B). Proliferation of both other cell lines  
229 examined, MDA-MB-231 (Fig. S4C-D) and MCF10A (Fig. 3C) were also significantly reduced by  
230 RNAi targeting SNHG7. The inhibition of proliferation in these cells is due to the reduction of  
231 SNHG7 levels and not an off-target effect as demonstrated by the ability of 3 different individual  
232 siRNA duplexes (Fig. 3D) that target SNHG7 to all inhibit proliferation (Fig. 3E). Interestingly,  
233 these data suggest that there is a dose-dependent response to SNHG7 levels as the individual

234 duplexes that were most efficient at inhibiting SNHG7 levels also inhibited proliferation the most  
235 (Fig. 3D-E). A live/dead assay demonstrated that the reduction in cell numbers by siSNHG7  
236 treatment is due to a decrease in proliferation (Fig. S4E) and not an increase in cell death (Fig.  
237 S4F). While control treated cells continued to increase in number, siSNHG7 treated cells do not  
238 (Fig. S4E); however, the number of dead cells is not significantly different between treatment  
239 groups (Fig. S4F). Additionally, FACS analysis with propidium iodine staining indicates that by 3  
240 days siSNHG7 treated MCF7 cells begin to arrest in G0/G1 (Fig. 3F). Reducing the expression  
241 of SNHG7 had no effect on the sensitivity of MCF7 cells to the dual-kinase IGF1R/InsR inhibitor,  
242 BMS-754807 (Fig.S4G). However, once again it is obvious that reduced SNHG7 expression  
243 decreases basal proliferation (Fig. S4G siCtl vs siSNHG7 at  $10^{-9}$ M). Together these data  
244 demonstrate that SNHG7 is necessary for full proliferation of breast cancer cell lines.

245 To test if SNHG7 is sufficient to induce or enhance proliferation, the two main isoforms  
246 of SNHG7 identified by RACE were cloned from cDNA of MCF7 cells. Two polyclonal MCF7 cell  
247 lines stably expressing SNHG7 were generated for each isoform (Fig. 3G) and non-linear  
248 regression analysis of proliferation data demonstrated that MCF7 cells overexpressing either  
249 isoform proliferated faster than cells expressing empty vector (Fig. 3H; doubling time=1.746-  
250 2.183 days for SNHG7 overexpressing cells vs. 2.684-2.89 days for empty vector cells  
251  $p<0.0001$ ). Therefore, SNHG7 is both necessary and sufficient for proliferation and regulates it  
252 in a dose-dependent manner. Furthermore, as described above, SNHG7 is overexpressed or  
253 amplified in ~5% of all breast cancer tumors in TCGA and correlates significantly with poorer  
254 disease-free survival (Fig. 1D and Table1). This suggests that SNHG7 may act as an oncogene  
255 under certain conditions driving poor prognosis through the regulation of proliferation.

256 **IGF/SNHG7 feedback through regulation of common transcripts**

257 Proliferation in response to IGF is regulated, at least in part, through the vast  
258 transcriptional changes downstream of IGF signaling. It is apparent that SNHG7 is also  
259 important for proliferation (Fig 3). To determine if SNHG7 controls proliferation through the  
260 alteration of similar transcripts as IGF1, we examined the expression of four known IGF1  
261 regulated genes after knockdown of SNHG7 (versus scramble control) and in an SNHG7  
262 overexpressing cell line (versus a vector control). Like IGF1 stimulation (Fig. 4A dark green),  
263 overexpression of SNHG7 (Fig. 4A dark blue) resulted in higher expression of LIF and EGR3  
264 and lower expression of IRS2 and SOCS2 compared to empty vector control cells (Fig. 4A).  
265 Reduction of SNHG7 expression (Fig. 4A dark red) caused the opposite effect, decreased  
266 expression of LIF and EGR3 and increased expression of IRS2 and SOCS2 (Fig. 4A). Together  
267 these data suggest that IGF1 and SNHG7 regulate the expression and direction of expression  
268 of similar transcripts.

269 To examine if this pattern is comprehensive we performed RNAseq following reduced  
270 expression of SNHG7 by RNAi. The expressions of 4,341 genes were significantly altered (Fig.  
271 4B and Supplementary Table 3; FDR <0.05) with 1308 annotated genes changing by at least  
272 1.5-fold. The regulation of expression of several genes was confirmed with qPCR (Fig. S5). At a  
273 global level, there was a negative correlation between genes regulated by IGF1 induction and  
274 knockdown of SNHG7 (Fig. 4C). Gene Set Enrichment Analyses (GSEA) demonstrated that  
275 IGF1-regulated genes (8hrs; FDR<0.05) are highly enriched in genes regulated by siSNHG7  
276 treatment (FDR <0.05; Fig. 4D top), and genes regulated by siSNHG7 are enriched for IGF1-  
277 regulated genes (Fig. 4D bottom). Collectively, these data demonstrate that IGF1 and SNHG7  
278 control the transcript levels of a similar set of genes and suggest that SNHG7, in part, regulates  
279 proliferation through the control of a similar transcriptome response as IGF. Additionally,  
280 Ingenuity Pathway Analysis (IPA) of siSNHG7-regulated genes showed that the top canonical  
281 pathways are Molecular Mechanisms of Cancer and IGF1 Signaling ( $p=3.93E-09$ ; 42/97

282 molecules altered; Fig. 4E) and the top molecular and cellular function is Cellular Growth and  
283 Proliferation. This further validates that SNHG7 is important in cancer development and  
284 proliferation. Likewise, it reveals that SNHG7 directly regulates the expression of IGF signaling  
285 transcripts (Fig. 4E) in addition to downstream targets in a manner that enhances the response  
286 of IGF1 signaling. However, RNAseq following IGF1 induction of siSNHG7 treated cells  
287 demonstrated that lack of SNHG7 did not prevent IGF from activating its signaling cascade  
288 (data not shown) or from regulating induction or repression of most transcripts (Fig. 4F;  
289 differences in siCtl\_ctl and siCtl\_IGF vs differences in siSNHG7\_ctl vs. siSNHG7\_IGF; Fig. S6).  
290 However, the overall levels of the transcripts were altered by reduction of SNHG7 expression  
291 leading to an attenuated IGF1 effect (Fig. 4F siCtl\_ctl vs siSNGH7\_ctl; Fig. 4F siCtl\_IGF vs  
292 siSNHG7\_IGF; Supplementary Table 4). This implies a fine-tuning feedback mechanism  
293 whereby IGF1 signaling decreases the expression of SNHG7, which is a positive regulator of  
294 IGF1 signaling intermediates and downstream targets through an independent regulation  
295 mechanism.

296 Finally, there are well-known issues with using breast cancer clinical data from TCGA  
297 due to short-term and limited follow up of the patients(40). Accordingly, we sought to confirm the  
298 clinical impact of extreme levels of SNHG7 in the tumors of breast cancer patients in the  
299 METABRIC(41) dataset that includes rich and long-term clinical data from over 2000 patients.  
300 However, the METABRIC gene expression dataset was calculated by microarray analysis,  
301 making it impossible to know the direct levels of SNHG7 and many other lncRNAs. For that  
302 reason, we used a guilt-by-association technique to infer the levels of SNHG7 in each of the  
303 patients. The top 100 upregulated and downregulated genes by siSNHG7, determined by fold  
304 change with a FDR <0.05, were used as an 'SNHG7 signature' and a Gene Set Variation  
305 Analysis(42) was performed to provide a score to each breast cancer tumor in the METABRIC  
306 dataset. Kaplan-Meier analysis demonstrates that patients with tumors with the highest decile of

307 SNHG7 scores (indicative of high SNHG7 levels) have a significantly poorer disease-  
308 free survival (logrank test p-value=0.00079) than those with lower scores (Fig. S7). This further  
309 argues that SNHG7 has an important biological and clinical role in breast cancer.

310

## 311 **DISCUSSION**

312 We leveraged the knowledge of IGF1 signaling and biology as a model system to identify a  
313 lncRNA, SNHG7, that is important for proliferation and breast cancer biology. By doing so we  
314 uncovered a novel fine-tuning feedback mechanism between IGF1 and SNHG7 that tightly  
315 regulates RNA expression and cell proliferation. As summarized in a schematic in Figure 5, our  
316 data shows that in addition to the regulation of many protein coding genes, IGF, which is  
317 necessary for proliferation, downregulates the expression of SNHG7. Our results also implicate  
318 SNHG7 in the regulation of expression of an enriched set of IGF1-regulated genes and of IGF1  
319 signaling intermediates (Fig. 5 left). Additionally, there is a dose-response correlation between  
320 SNHG7 levels and proliferation. Therefore, when IGF1 signaling is active it alters gene  
321 expression (including downregulation of SNHG7) to increase proliferation (Fig. 5 middle).  
322 However, by reducing SNHG7, which regulates a similar set of genes as IGF1, and also  
323 numerous IGF1 signaling intermediates, the amplitude of IGF1-regulated genes is muted (Fig. 5  
324 middle). When this feedback mechanism is overwhelmed, for example by the overexpression of  
325 SNHG7 or the disruption of SNHG7 regulation by IGF1 (indicated by an x), it leads to enhanced  
326 proliferation at least in part through differences in overall magnitude of IGF targets (Fig. 5 right –  
327 induced genes are expressed higher; repressed genes are repressed lower).

328 It is paradoxical that IGF1 would repress SNHG7, which controls the expression of many  
329 of the same genes (in the same direction) and is necessary for proliferation, while  
330 simultaneously inducing proliferation. However, our results and others(9) show that IGF1

331 signaling reduces the expression of IRS2, an immediate downstream signaling scaffold, and  
332 increases the expression of numerous phosphatases (DUSPs) that dephosphorylate and  
333 inactivate many of the kinases downstream of IGF1R. Thus, IGF1 regulation of SNHG7  
334 expression is an example of a systems biology feedback mechanism to auto-attenuate IGF1  
335 signaling. Further, our knock-down experiments that completely inhibit proliferation reduce  
336 SNHG7 levels much lower than IGF1 signaling does (90% vs. 40%) suggesting there is a critical  
337 amount of SNHG7 necessary for proliferation. Therefore, we propose that IGF1 regulates  
338 SNHG7 levels as a feed-back mechanism to fine-tune the transcriptional response and  
339 proliferation induced by IGF1 to prevent hyperproliferation or transformation/progression. If this  
340 is true, we would predict that high levels of SNHG7 could lead to hyperproliferation. Accordingly,  
341 SNHG7 is overexpressed or amplified in ~5% of TCGA breast cancer patients, and these  
342 patients have worse disease-free survival than those without SNHG7 alterations.

343 In this report, we also describe a novel posttranscriptional mechanism of regulation of  
344 SNHG7 through alterations in stability via the MAPK pathway. SNHG7 is a 5'TOP gene like  
345 Gas5, which are regulated by nonsense mediated decay (NMD) through translation(43). While  
346 SNHG7 levels are altered by mTOR and translational inhibition (data not shown), it is clear that  
347 IGF1/MAPK regulation of SNHG7 levels is independent of translation induced by IGF1 because  
348 inhibition of translation, mTOR, and PI3K/AKT did not prevent IGF1 mediated downregulation of  
349 SNHG7. This suggests an additional mechanism of regulation of 5'TOP genes that requires  
350 further investigation.

351 Our results that IGF-regulated lncRNAs, including SNHG7 and SNHG15, are important  
352 for biology, enriched in breast cancer subtypes, and correlate with survival are consistent with  
353 recent studies. A large number of functionally important lncRNAs were shown to be regulated by  
354 estrogen signaling(25), but ours is the first study that examined regulation of lncRNAs by IGF.  
355 Additionally, through reanalysis of TCGA data, others have demonstrated that certain lncRNAs

356 are enriched in specific breast cancer subtypes and lncRNAs alone can accurately stratify  
357 patients into molecular subtypes(44–46). In fact, lncRNAs were shown to be more subtype  
358 specific than protein coding genes and some correspond to patient survival, suggesting their  
359 utility as biomarkers(45). It is still unclear if SNHG7 or other IGF-regulated lncRNAs can be  
360 used as biomarkers or targeted for therapy. However, further understanding of the IGF1/SNHG7  
361 system, the mechanisms of SNHG7 functions, and the characterization of other IGF1-regulated  
362 lncRNAs clearly will impact our understanding of both basic and breast cancer biology.

363

364 **Figure 1. IGF1 Signaling regulates the expression of lncRNAs.** (A) RNAseq and informatics  
365 pipeline used to identify persistently IGF1 regulated known lncRNAs. The Tuxedo package was  
366 used to determine differentially expressed (DE) genes after IGF1 treatment. Novel gene  
367 discovery was allowed, but for a conservative estimate only genes with Gencode V21 lncRNA  
368 annotation that did not overlap with a protein coding gene (PCG) annotation on either strand are  
369 reported. (B) Heatmap of the expression of lncRNAs (as defined in Fig. 1A) significantly  
370 regulated by IGF1 treatment at 3 or 8hrs. Expression levels are normalized to the mean of the  
371 respective vehicle (Veh) control. Each column is a replicate of the indicated treatment group and  
372 each row is an individual lncRNA (C) Venn Diagram demonstrating the number of lncRNAs  
373 significantly regulated at 3hrs (blue), 8hrs (red), or both (purple). (D) SNHG7 is amplified or  
374 overexpressed in a subset of the tumors of TCGA patients (N=45). Those patients have a worse  
375 Disease Free Survival (Log-rank Test  $p < 0.05$ ) than patients with normal levels of SNHG7 DNA  
376 and RNA (N=866). Patients with a copy number loss of SNHG7 (N=3) were ignored. (E)  
377 Normalized RNASeq V2 RSEM expression data from annotated lncRNAs in TCGA breast  
378 cancer (BC) data that are regulated by IGF at 3 and 8hrs was downloaded from the TCGA data  
379 portal. Values were log2 transformed and then median centered by gene. Breast cancer  
380 molecular subtypes determined by PAM50 scores(47) are indicated by color. (F) Validation of



381 IGF regulation of indicated lncRNA by qPCR. Results are reported as the mean expression  
382 normalized to time-matched vehicle control +/- SD (ttest  $p < 0.05$  for all comparisons to  
383 respective control).

384 **Figure 2. SNHG7 expression is downregulated by IGF1 signaling via a posttranscriptional**

385 **mechanism through MAPK.** (A) Schematic of two prominent isoforms of SNHG7 with (SNHG7

386 l) or without (SNHG7 NI) a fourth intron. SNORA17 and 43 are processed from the second and

387 third introns of SNHG7. (B) RNA levels of the indicated genes in exponentially growing MCF7

388 cells following subcellular fractionation and subsequent qPCR analysis. The mean percentage

389 +/- SD are reported. (C) Time course analysis of SNHG7 levels following the stimulation of

390 serum starved MCF7 cells with 100nM IGF1 or vehicle control. Reported are the relative mean

391 expressions +/- SD at each time point of biological triplicates to RPL19 and normalized to the

392 respective vehicle treated cells. (D) MCF7 cells were plated in triplicate and the next day,

393 BMS754807, an IGF1R inhibitor, was added to the media for 4 hours. RNA was isolated and

394 qPCR performed as described above (t-test  $p < 0.05$ ). (E) SNHG7 levels determined by qPCR as

395 in (C), but in MCF10a cells. (F) The correlation of expression of SNHG7 and IGF1R RNA in 56

396 breast cancer cell lines (spearman = -0.2727;  $p < 0.05$ ). Raw reads from RNAseq data published

397 by Joe Grey et al. (38) from 56 breast cancer cell lines were reanalyzed through the pipeline

398 described in Fig. 1A to determine the expression of SNHG7 and IGF1R. (G) Expression of the

399 snoRNAs in SNHG7s introns determined by qPCR at 3 and 8 hrs. Levels were calculated as

400 described above and are reported as the mean expression +/- SD of biological triplicates.

401 (H-I) MCF7 cells were plated in triplicate for each treatment group, starved overnight, pretreated

402 with the indicated drug for 1-2hrs before stimulation with IGF1 or vehicle control for 8hrs. Cells

403 were harvested, RNA was isolated, cDNA was generated, and qPCR was performed and is

404 presented as described above. (H) 10ug/ml of actinomycin was used to inhibit transcription and

405 all results are normalized to the DMSO/Ctl group (I) 50uM of U0126 was used to inhibit MEK;

406 500nM of Wortmanin was used to inhibit PI3K; 1ug/ml of rapamycin was used to inhibit mTOR;  
407 50 ug/ml of cycloheximide was used to inhibit translation; and, ctl was DMSO. Reported is the  
408 mean +/- SD normalized to the respective Ctl.

409

410 **Figure 3. SNHG7 regulates proliferation in a dose-dependent manner.**

411 (A) MCF7 cells plated in triplicate were reverse transfected with a pool of two siRNA duplexes  
412 targeting SNHG7 or a non-targeting control. RNA was isolated and qPCR was performed as  
413 described earlier to determine expression levels of SNHG7 and the snoRNAs in its introns.(B-C)  
414 Eight biological replicates of (B) MCF7 or (C) MCF10a cells per treatment and time were  
415 reverse transfected as described above into 96-well dishes. At each time, media was removed  
416 and proliferation was assayed according to protocol (FluoReporter; Life) and mean +/- SEM is  
417 reported (non-linear regression;  $p < 0.05$ ). (D) MCF7 cells plated in triplicate were reverse  
418 transfected with three individual siRNA duplexes targeting SNHG7 or a non-targeting control  
419 (siCtl). RNA was isolated and qPCR was performed as described above to determine  
420 knockdown of SNHG7. (E) Eight biological replicates of MCF7 cells were reverse transfected  
421 with the three individual siRNAs for five days. Proliferation was measured as described above  
422 and the mean +/- SEM for 8 biological replicates are reported. All results in D and E are  
423 significant (ttests vs. siCtl  $< 0.05$ ). (F) MCF7 cells were reverse transfected in triplicate as  
424 described above. After 3 days the cells were fixed, stained with propidium iodide, and cell cycle  
425 analysis was performed using flow cytometry. The mean percentage of cells in each cell cycle  
426 phases +/- SD are graphed and are significantly different (ttest siCtl vs. siSNHG7;  $p < 0.05$ ). (G-  
427 H) The two isoforms of SNHG7 (see Fig. 2A) were cloned into pcdna3.1, transfected into MCF7  
428 cells individually, and multiple polyclonal cell lines were generated by selection with G418. The  
429 number after p indicates the clone number. (G) qPCR was performed and mean +/- SEM are  
430 reported of biological triplicates to verify that SNHG7 was expressed higher than clones  
431 generated by transfection of vector alone (all significant; ttest  $p < 0.05$ ). (H) The proliferation of

432 the MCF7 cells overexpressing either isoform of SNHG7 compared to empty vector was  
433 measured by the FluoReporter assay (normalized to day1 for each cell line to control for slight  
434 variation in seeding density). The mean +/- SEM is reported and shows that cells  
435 overexpressing either isoform of SNHG7 significantly ( $p < 0.0001$  nonlinear regression; 8  
436 replicates for each treatment/time point) enhanced proliferation.

437

438 **Figure 4. SNHG7 controls the expression of IGF1 signaling molecules and IGF1-regulated**  
439 **genes**

440

441 (A) (green bars) MCF7 cells plated in triplicate were starved overnight and then treated with  
442 IGF1 or control. RNA was isolated, and qPCR was performed as described. The mean  
443 expression +/- SEM relative to control is reported to show example transcripts that are  
444 upregulated (Lif and Egr3) and downregulated (Irs2 and Socs2) by IGF1 signaling. (blue bars)  
445 The mean +/- SEM relative expression of the same genes from triplicate experiments in  
446 logarithmically growing MCF7 cells stably expressing SNHG7-I or a vector control to  
447 demonstrate regulation by overexpression of SNHG7. (red bars) Reverse transfection with  
448 siSNHG7 or control was performed as described previously and qPCR was performed to  
449 determine the expression of the same targets with decreased levels of SNHG7. (B) RNAseq  
450 was performed and analyzed as described in the methods following 3 days of siSNHG7 or siCtl  
451 treatment in MCF7 cells. The heatmap shows the relative expression of significantly regulated  
452 genes ( $q < 0.05$ ) for all replicates ( $N=3$  for each condition) to the mean expression of Ctl treated  
453 cells. (C) Heatmap of significantly regulated genes by IGF after 8hrs of treatment of serum  
454 starved MCF7 cells and the respective expression of those genes following 3 days of siSNHG7  
455 treatment. All expressions are normalized to the corresponding controls. (D) Gene Set  
456 Enrichment Preranked Analysis (GSEA) of (top) differentially expressed genes from  
457 IGF1RNAseq at 8hrs vs. differentially expressed genes from siSNHG7 RNAseq ( $FDR < 0.0001$ ;

458 Normalized Enrichment Score (NES) 2.83), and (bottom) GSEA of differentially expressed  
459 genes from siSNHG7 RNAseq vs. differentially expressed genes from IGF1 RNAseq at 8hrs  
460 (FDR < 0.05; NES = -1.84). ES = Enrichment Score. (E) Ingenuity Pathway Analysis revealed  
461 IGF1 signaling as a top pathway altered. Heatmap shows the 42 genes in the IGF1 pathway  
462 (out of 91) that are differentially regulated by siSNHG7 treatment. Highlighted red are key IGF1  
463 signaling genes. (F) MCF7 cells reverse transfected for 2 days with siSNHG7 or nontargeting  
464 siCtl were serum starved overnight and treated with IGF or vehicle control (ctl) for 8hrs. RNA  
465 was isolated and RNAseq was performed as previously described. Shown are the log2 median  
466 centered values for all significantly altered genes (FDR < 0.05; average fpkm >1 for any  
467 condition; known annotation) between any of the conditions as determined by CuffDiff.

468

469 **Figure 5. Model of attenuated regulation of IGF1 signaling and proliferation by SNHG7**

470 (left) IGF signaling and SNHG7 regulate the expression of a similar gene set. IGF1 signaling  
471 decreases SNHG7 expression, while SNHG7 enhances the expression of IGF1 signaling  
472 molecules. Both IGF1 signaling and SNHG7 are necessary for proliferation. (middle) Upon  
473 enhanced IGF1 signaling, IGF1 initiates a transcriptional response, while simultaneously  
474 downregulating SNHG7, which attenuates the expression of the same transcriptional response;  
475 thus, a fine-tuning feedback mechanism that tightly regulates the proliferation response. (right)  
476 With overexpression of SNHG7 or the inability of IGF to downregulate SNHG7 as indicated by  
477 an X, the transcriptional response to IGF1 is enhanced (induced genes expressed higher;  
478 repressed genes expressed lower as indicated by the size of the font) leading to  
479 hyperproliferation.

480

481 **Table 1. SNHG7 is an lncRNA persistently regulated by IGF1 that is altered in breast**

482 **cancer.** Table indicates the expression, significant regulation (FDR <0.05) by IGF at 3 and 8hrs,  
483 alteration (copy number alterations and expression with z-Score threshold at +/- 2.0 in TCGA

484 data as determined by cBioportal), and effect on survival (significant KM curve in altered vs.  
485 unaltered groups) of each persistently IGF-regulated lncRNA with a REFSeq ID.

486

## 487 **Methods**

488 **Cell Culture, treatments, and transfections:** MCF7, MDA-MB-231, T47D, and MCF10A cells  
489 were obtained by ATCC and all experiments were performed within 25 passages. MCF7 and  
490 MDA-MB-231 cells were maintained in DMEM+10%FBS; T47D in RPMI-1640+10%FBS; and  
491 MCF10A cells in DMEM:F12(1:1)+5%HS, 20ng/ml EGF, 0.5 mg/ml hydrocortisone, 100ng/ml  
492 cholera toxin, and 10ug/ml Insulin. For IGF induction experiments, all cells were washed 2x in  
493 PBS and serum deprived in modified IMEM+10mM HEPES, 1ug/ml transferrin, 1ug/ml  
494 fibronectin, and 2mM L-glutamine for 16hrs before addition of 100ng/mL or equal volume of  
495 10mM HCl as a vehicle control. To determine the mechanism of SNHG7 regulation, serum  
496 starved cells were pretreated for 1-2hrs with 10ug/ml actinomycin to prevent transcription,  
497 1ug/ml rapamycin (mTOR inhibitor), 50uM U0126 (MEK inhibitor), 500 nM Wortmanin (PI3K  
498 inhibitor), or 50ug/ml cycloheximide (translational inhibitor) before addition of IGF1. BMS-  
499 754807 at 10 uM was used as an IGF1R inhibitor. MCF7 cells expressing either SNHG7 isoform or  
500 vector alone were created by cloning and then transfecting (Fugene 6) the respective SNHG7  
501 isoform from MCF7 generated cDNA using the GeneRacer Kit (ThermoFisher) after 3' RACE  
502 (see Supplementary Methods for primers and additional details). Individual polyclonal lines were  
503 isolated following 2 weeks of selection with 1ug/ml G418.

504 **RNA Sequencing:** Total RNA from biological triplicates was isolated, quality was determined  
505 (Bioanalyzer), rRNA was depleted (RiboMinus), multiplexed paired-end libraries were prepared  
506 (Illumina TruSeq), and sequencing was performed on an Illumina HiSeq (IGF RNAseq) or  
507 NextSeq (siSNHG7 RNAseq). Quality of the sequencing was determined by running FastQC.

508 Differential gene expression was calculated by mapping reads to hg19 with Tophat2 (masking  
509 reads to miRNAs, snRNAs, snoRNAs, rRNAs, and tRNAs) to a concatenated .gtf of UCSC  
510 known genes and lincRNA annotations published by the Broad Institute(48) and assembled  
511 using Cufflinks allowing for novel gene discovery. To determine IGF1 regulated lincRNAs as  
512 listed in Figure 1, the raw reads were reanalyzed to a newer and more comprehensive  
513 annotations. Reads were mapped to GRCh38 with Tophat2 as documented above using  
514 Gencode v.21 annotations and again assembled using Cufflinks allowing for novel gene  
515 discovery. For all analyses differential gene expression was determined with Cuffdiff and gene  
516 names were converted with custom scripts as needed. A conservative list of IGF-regulated  
517 lincRNAs was generated by extracting any differentially expressed gene with a Cufflinks  
518 prescribed lincRNA annotation (Gencode v.21). If that gene also had a protein coding gene  
519 annotation, it was not considered a lincRNA. Heatmaps of differentially expressed lincRNAs were  
520 generated in MeV after the described normalizations. Preranked Gene Set Enrichment Analysis  
521 (42) was performed according to instructions comparing IGF-regulated genes to those altered  
522 by siSNHG7 treatment. Ingenuity Pathway Analysis was performed according to protocol using  
523 genes significantly regulated (FDR <0.01) by siSNHG7 treatment compared to control. All reads  
524 are deposited in SRA with accession numbers: PRJNA514323, PRJNA515247, and  
525 PRJNA515028.

526 **Quantitative RT-PCR:** After treatment at the indicated times, cells were harvested, RNA was  
527 isolated, cDNA was generated, and qPCR were performed as described previously(49).  
528 Relative RNA levels were calculated using the  $\Delta\Delta\text{CT}$  method compared to RPL19 as the  
529 reference gene. All experiments were conducted in biological and technical triplicates. For  
530 subcellular localization, logarithmically growing cells were trypsinized, pellet was washed x2 in  
531 PBS, and cells were lysed in buffer RLN (50mM Tris-HCl pH 8.0, 140mM NaCl, 1.5 mM MgCl<sub>2</sub>,  
532 0.5% NP40). After the cytoplasm was removed, the nuclear pellet was washed x2 in Buffer RLN

533 before addition of buffer RLT (Qiagen). RNA from both fractions were isolated using Qiazol  
534 following manufactures' protocol.

535 **RNA Interference:** All cells were reverse transfected using 50-100 nM final concentration of  
536 either individual or 2-4 pooled oligos from Dharmacon (see Supplementary methods for  
537 sequences) using RNAi Max at a final concentration of 3ul/ml. All assays were performed  
538 ~72hrs after siRNA treatment.

539 **Proliferation Assays:** Cells treated as described were seeded in 96-well dishes with at least 6  
540 biological replicates. At the indicated times following treatment, plates were harvested and  
541 proliferation was scored with the FluoReporter (ThermoFisher) assay by quantitation of dsDNA  
542 according to manufacturers' instructions on the Victor X4 (PerkinElmer). Proliferation was also  
543 scored via counting cells with a hemocytometer (Fig. S4A) using Trypan Blue exclusion in  
544 triplicate plated MCF7 cells in 6-well dishes.

545 **Cell Cycle Assay:** MCF7 cells were reverse transfected with siSNHG7, nontargeting control, or  
546 nothing in biological triplicates. After 3 days, the cells were collected, fixed in 70% ethanol for  
547 1hr, stained with 100ug/mL propidium iodide for 1hr, and then analyzed by flow cytometry. The  
548 percentage of cells in each phase of the cell cycle was calculated according to protocol.

549

550 This article contains supporting information online at [www.pnas.org](http://www.pnas.org)

551 **CONFLICTS OF INTEREST:** none

552 **ACKNOWLEDGEMENTS:**

553 We thank the Breast Cancer Research Foundation (AVL), National Cancer Institute of the  
554 National Institutes of Health award number R01CA94118 (AVL) and P30CA047904 (AVL), and

555 a Susan G Komen for the Cure postdoctoral fellowship, award number PDF12229789 (DB). AVL  
556 is a recipient of Scientific Advisory Council award from Susan G. Komen for the Cure, and a  
557 Hillman Foundation Fellow. We would also like to thank William Horn and the Genomics  
558 Research Core at the University of Pittsburgh as well as McGill University for performing the  
559 RNA sequencing and Nolan Priedigkeit and Ryan Hartmaier for carefully editing the manuscript.

560 **REFERENCES:**

- 561 1. Gualberto a, Pollak M. Emerging role of insulin-like growth factor receptor inhibitors in  
562 oncology: early clinical trial results and future directions. *Oncogene* [Internet].  
563 2009;28(34):3009–21. Available from: <http://www.ncbi.nlm.nih.gov/pubmed/19581933>
- 564 2. Pollak M. Insulin and insulin-like growth factor signalling in neoplasia. *Nat Rev Cancer*  
565 [Internet]. 2008;8(12):915–28. Available from:  
566 <http://www.ncbi.nlm.nih.gov/pubmed/19029956>
- 567 3. Boone DN, Lee A V. Targeting the insulin-like growth factor receptor: developing  
568 biomarkers from gene expression profiling. *Crit Rev Oncog* [Internet]. 2012;17(2):161–73.  
569 Available from:  
570 [http://www.pubmedcentral.nih.gov/articlerender.fcgi?artid=3926653&tool=pmcentrez&ren](http://www.pubmedcentral.nih.gov/articlerender.fcgi?artid=3926653&tool=pmcentrez&rendertype=abstract)  
571 [dertype=abstract](http://www.pubmedcentral.nih.gov/articlerender.fcgi?artid=3926653&tool=pmcentrez&rendertype=abstract)
- 572 4. Pollak M. The insulin and insulin-like growth factor receptor family in neoplasia: an  
573 update. *Nat Rev Cancer* [Internet]. 2012;12(3):159–69. Available from:  
574 <http://www.ncbi.nlm.nih.gov/pubmed/22337149>
- 575 5. Djebali S, Davis CA, Merkel A, Dobin A, Lassmann T, Mortazavi A, et al. Landscape of  
576 transcription in human cells. *Nature* [Internet]. 2012;489(7414):101–8. Available from:  
577 <http://www.nature.com/nature/journal/v489/n7414/pdf/nature11233.pdf>



- 578 6. Schmitt AM, Chang HY. Long Noncoding RNAs in Cancer Pathways. Vol. 29, Cancer  
579 Cell. 2016. p. 452–63.
- 580 7. Gupta R a, Shah N, Wang KC, Kim J, Horlings HM, Wong DJ, et al. Long non-coding  
581 RNA HOTAIR reprograms chromatin state to promote cancer metastasis. Nature  
582 [Internet]. 2010;464(7291):1071–6. Available from:  
583 [http://www.pubmedcentral.nih.gov/articlerender.fcgi?artid=3049919&tool=pmcentrez&ren](http://www.pubmedcentral.nih.gov/articlerender.fcgi?artid=3049919&tool=pmcentrez&rendertype=abstract)  
584 [dertype=abstract](http://www.pubmedcentral.nih.gov/articlerender.fcgi?artid=3049919&tool=pmcentrez&rendertype=abstract)
- 585 8. Rajski M, Zanetti-Dällenbach R, Vogel B, Herrmann R, Rochlitz C, Buess M. IGF-I  
586 induced genes in stromal fibroblasts predict the clinical outcome of breast and lung  
587 cancer patients. BMC Med. 2010;8:1.
- 588 9. Creighton CJ, Casa A, Lazard Z, Huang S, Tsimelzon A, Hilsenbeck SG, et al. Insulin-like  
589 growth factor-I activates gene transcription programs strongly associated with poor breast  
590 cancer prognosis. J Clin Oncol. 2008;26(25):4078–85.
- 591 10. Pollak M. Insulin and insulin-like growth factor signalling in neoplasia. Nat Rev Cancer  
592 [Internet]. 2008;8(12):915–28. Available from:  
593 [http://www.ncbi.nlm.nih.gov/entrez/query.fcgi?cmd=Retrieve&db=PubMed&dopt=Citation](http://www.ncbi.nlm.nih.gov/entrez/query.fcgi?cmd=Retrieve&db=PubMed&dopt=Citation&list_uids=19029956)  
594 [&list\\_uids=19029956](http://www.ncbi.nlm.nih.gov/entrez/query.fcgi?cmd=Retrieve&db=PubMed&dopt=Citation&list_uids=19029956)
- 595 11. Guttman M, Amit I, Garber M, French C, Lin MF, Feldser D, et al. Chromatin signature  
596 reveals over a thousand highly conserved large non-coding RNAs in mammals. Nature  
597 [Internet]. 2009;458(7235):223–7. Available from:  
598 [http://www.pubmedcentral.nih.gov/articlerender.fcgi?artid=2754849&tool=pmcentrez&ren](http://www.pubmedcentral.nih.gov/articlerender.fcgi?artid=2754849&tool=pmcentrez&rendertype=abstract)  
599 [dertype=abstract](http://www.pubmedcentral.nih.gov/articlerender.fcgi?artid=2754849&tool=pmcentrez&rendertype=abstract)
- 600 12. Iyer MK, Niknafs YS, Malik R, Singhal U, Sahu A, Hosono Y, et al. The landscape of long

- 601 noncoding RNAs in the human transcriptome. *Nat Genet* [Internet]. 2015;47(3):199–208.  
602 Available from:  
603 <http://www.ncbi.nlm.nih.gov/pubmed/25599403>[http://www.pubmedcentral.nih.gov/a](http://www.pubmedcentral.nih.gov/articlerender.fcgi?artid=PMC4417758)  
604 [rticlerender.fcgi?artid=PMC4417758](http://www.pubmedcentral.nih.gov/articlerender.fcgi?artid=PMC4417758)
- 605 13. Yuan J, Yang F, Wang F, Ma J, Guo Y, Tao Q, et al. A long noncoding RNA activated by  
606 TGF- $\beta$  promotes the invasion-metastasis cascade in hepatocellular carcinoma. *Cancer*  
607 *Cell* [Internet]. 2014;25(5):666–81. Available from:  
608 <http://www.ncbi.nlm.nih.gov/pubmed/24768205>
- 609 14. Rinn JL, Chang HY. Genome regulation by long noncoding RNAs. *Annu Rev Biochem*  
610 [Internet]. 2012;81:145–66. Available from:  
611 [http://www.pubmedcentral.nih.gov/articlerender.fcgi?artid=3858397&tool=pmcentrez&ren](http://www.pubmedcentral.nih.gov/articlerender.fcgi?artid=3858397&tool=pmcentrez&rendertype=abstract)  
612 [dertype=abstract](http://www.pubmedcentral.nih.gov/articlerender.fcgi?artid=3858397&tool=pmcentrez&rendertype=abstract)
- 613 15. Guttman M, Rinn JL. Modular regulatory principles of large non-coding RNAs. *Nature*  
614 [Internet]. 2012;482(7385):339–46. Available from:  
615 <http://www.ncbi.nlm.nih.gov/pubmed/22337053>
- 616 16. Guttman M, Russell P, Ingolia NT, Weissman JS, Lander ES. Ribosome profiling  
617 provides evidence that large noncoding RNAs do not encode proteins. *Cell*.  
618 2013;154(1):240–51.
- 619 17. Ulitsky I and DB. lincRNAs: Genomics, Evolution, and Mechanisms. *Cell*.  
620 2013;154(1):26–46.
- 621 18. Lee JT, Davidow LS, Warshawsky D. Tsix, a gene antisense to Xist at the X-inactivation  
622 centre. *Nat Genet* [Internet]. 1999;21(4):400–4. Available from:  
623 <http://dx.doi.org/10.1038/7734>

- 624 19. Engreitz JM, Pandya-Jones A, McDonel P, Shishkin A, Sirokman K, Surka C, et al. The  
625 Xist lncRNA exploits three-dimensional genome architecture to spread across the X  
626 chromosome. *Science* (80- ) [Internet]. 2013;341(6147):1237973. Available from:  
627 <http://www.sciencemag.org/cgi/doi/10.1126/science.1237973>  
628 [doi/10.1126/science.1237973](http://www.sciencemag.org/cgi/doi/10.1126/science.1237973)
- 629 20. Brown CJ, Hendrich BD, Rupert JL, Lafrenière RG, Xing Y, Lawrence J, et al. The human  
630 XIST gene: Analysis of a 17 kb inactive X-specific RNA that contains conserved repeats  
631 and is highly localized within the nucleus. *Cell*. 1992;71(3):527–42.
- 632 21. MARISA S. BARTOLOMEI SZ& SMT. Parental imprinting of the mouse H19 gene.  
633 *Nature*. 1991;351:153–5.
- 634 22. Sur I, Taipale J. Parental imprinting of the mouse H19 gene. *Nat Rev Cancer* [Internet].  
635 2016;351(6322):153–5. Available from:  
636 <http://www.nature.com/nrc/journal/v16/n8/full/nrc.2016.62.html>
- 637 23. Wang KC, Chang HY. Molecular mechanisms of long noncoding RNAs. *Mol Cell*.  
638 2012;43(6):904–14.
- 639 24. Mourtada-Maarabouni M, Pickard M, Hedge V, Farzaneh F, Williams G. GAS5, a non-  
640 protein-coding RNA, controls apoptosis and is downregulated in breast cancer.  
641 *Oncogene*. 2009;28373:195–208.
- 642 25. Sun M, Gadad SS, Kim DS, Kraus WL. Discovery, Annotation, and Functional Analysis of  
643 Long Noncoding RNAs Controlling Cell-Cycle Gene Expression and Proliferation in  
644 Breast Cancer Cells. *Mol Cell*. 2015;59(4):698–711.
- 645 26. Hansji H, Leung EY, Baguley BC, Finlay GJ, Askarian-Amiri ME. Keeping abreast with  
646 long non-coding RNAs in mammary gland development and breast cancer. *Front Genet*.

- 647 2014;5(OCT):1–15.
- 648 27. Ji P, Diederichs S, Wang W, Böing S, Metzger R, Schneider PM, et al. MALAT-1, a novel  
649 noncoding RNA, and thymosin beta4 predict metastasis and survival in early-stage non-  
650 small cell lung cancer. *Oncogene* [Internet]. 2003;22(39):8031–41. Available from:  
651 [http://eutils.ncbi.nlm.nih.gov/entrez/eutils/elink.fcgi?dbfrom=pubmed&id=12970751&retm](http://eutils.ncbi.nlm.nih.gov/entrez/eutils/elink.fcgi?dbfrom=pubmed&id=12970751&retmode=ref&cmd=prlinks%5Cnpapers3://publication/doi/10.1038/sj.onc.1206928)  
652 [ode=ref&cmd=prlinks%5Cnpapers3://publication/doi/10.1038/sj.onc.1206928](http://eutils.ncbi.nlm.nih.gov/entrez/eutils/elink.fcgi?dbfrom=pubmed&id=12970751&retmode=ref&cmd=prlinks%5Cnpapers3://publication/doi/10.1038/sj.onc.1206928)
- 653 28. Askarian-Amiri ME, Crawford J, French JD, Smart CE, Smith MA, Clark MB, et al.  
654 SNORD-host RNA Zfas1 is a regulator of mammary development and a potential marker  
655 for breast cancer. *RNA* [Internet]. 2011;17(5):878–91. Available from:  
656 [http://www.pubmedcentral.nih.gov/articlerender.fcgi?artid=3078737&tool=pmcentrez&ren](http://www.pubmedcentral.nih.gov/articlerender.fcgi?artid=3078737&tool=pmcentrez&rendertype=abstract)  
657 [dertype=abstract](http://www.pubmedcentral.nih.gov/articlerender.fcgi?artid=3078737&tool=pmcentrez&rendertype=abstract)
- 658 29. Prensner JR, Chinnaiyan AM. The emergence of lncRNAs in cancer biology. Vol. 1,  
659 *Cancer Discovery*. 2011. p. 391–407.
- 660 30. Ellis BC, Graham LD, Molloy PL. CRNDE, a long non-coding RNA responsive to  
661 insulin/IGF signaling, regulates genes involved in central metabolism. *Biochim Biophys*  
662 *Acta - Mol Cell Res*. 2014;1843(2):372–86.
- 663 31. Graham LD, Pedersen SK, Brown GS, Ho T, Kassir Z, Moynihan AT, et al. Colorectal  
664 Neoplasia Differentially Expressed (CRNDE), a Novel Gene with Elevated Expression in  
665 Colorectal Adenomas and Adenocarcinomas. *Genes and Cancer*. 2011;2(8):829–40.
- 666 32. Ellis BC, Molloy PL, Graham LD. CRNDE: A long non-coding RNA involved in Cancer  
667 Neurobiology, and DEvelopment. Vol. 3, *Frontiers in Genetics*. 2012. p. 1–15.
- 668 33. Trapnell C, Roberts A, Goff L, Pertea G, Kim D, Kelley DR, et al. Differential gene and  
669 transcript expression analysis of RNA-seq experiments with TopHat and Cufflinks. *Nat*

- 670 Protoc [Internet]. 2012;7(3):562–78. Available from:  
671 <http://dx.doi.org/10.1038/nprot.2012.016>  
672 <http://www.pubmedcentral.nih.gov/articlerender.fcgi?artid=3334321&tool=pmcentrez&rendertype=abstract>
- 673 34. Harrow J, Frankish A, Gonzalez JM, Tapanari E, Diekhans M, Kokocinski F, et al.  
674 GENCODE: The reference human genome annotation for the ENCODE project. *Genome*  
675 *Res.* 2012;22(9):1760–74.
- 676 35. Cerami E, Gao J, Dogrusoz U, Gross BE, Sumer SO, Aksoy BA, et al. The cBio Cancer  
677 Genomics Portal: An open platform for exploring multidimensional cancer genomics data.  
678 *Cancer Discov.* 2012;2(5):401–4.
- 679 36. Gao J, Aksoy BA, Dogrusoz U, Dresdner G, Gross B, Sumer SO, et al. Integrative  
680 analysis of complex cancer genomics and clinical profiles using the cBioPortal. *Sci*  
681 *Signal.* 2013;6(269):1–19.
- 682 37. Lin MF, Jungreis I, Kellis M. PhyloCSF: A comparative genomics method to distinguish  
683 protein coding and non-coding regions. *Bioinformatics.* 2011;27(13).
- 684 38. Daemen A, Griffith OL, Heiser LM, Wang NJ, Enache OM, Sanborn Z, et al. Modeling  
685 precision treatment of breast cancer. *Genome Biol* [Internet]. 2013;14(10):R110.  
686 Available from:  
687 <http://www.pubmedcentral.nih.gov/articlerender.fcgi?artid=3937590&tool=pmcentrez&rendertype=abstract>  
688
- 689 39. Jefferies HBJ, Fumagalli S, Dennis PB, Reinhard C, Pearson RB, Thomas G. Rapamycin  
690 suppresses 5'TOP mRNA translation through inhibition of p70(s6k). *EMBO J.*  
691 1997;16(12):3693–704.
- 692 40. Liu J, Lichtenberg T, Hoadley KA, Poisson LM, Lazar AJ, Cherniack AD, et al. An

- 693 Integrated TCGA Pan-Cancer Clinical Data Resource to Drive High-Quality Survival  
694 Outcome Analytics. *Cell*. 2018;
- 695 41. Curtis C, Shah SP, Chin SF, Turashvili G, Rueda OM, Dunning MJ, et al. The genomic  
696 and transcriptomic architecture of 2,000 breast tumours reveals novel subgroups. *Nature*.  
697 2012;486(7403):346–52.
- 698 42. Hänzelmann S, Castelo R, Guinney J. GSVA: Gene set variation analysis for microarray  
699 and RNA-Seq data. *BMC Bioinformatics*. 2013;14.
- 700 43. Williams GT, Mourtada-Maarabouni M, Farzaneh F. A critical role for non-coding RNA  
701 GAS5 in growth arrest and rapamycin inhibition in human T-lymphocytes. *Biochem Soc  
702 Trans [Internet]*. 2011;39(2):482–6. Available from:  
703 <http://www.ncbi.nlm.nih.gov/pubmed/21428924>
- 704 44. Van Grembergen O, Bizet M, de Bony EJ, Calonne E, Putmans P, Brohee S, Olsen C,  
705 Guo M, Bontempi G, Sotiriou C, Defrance M FF. RNAs, Portraying breast cancers with  
706 long noncoding. *Sci Adv*. 2016;2(9).
- 707 45. Yan X, Hu Z, Feng Y, Hu X, Yuan J, Zhao SD, et al. Comprehensive Genomic  
708 Characterization of Long Non-coding RNAs across Human Cancers. *Cancer Cell  
709 [Internet]*. 2015;28(4):529–40. Available from:  
710 <http://www.ncbi.nlm.nih.gov/pubmed/26461095>  
711 [http://ac.els-  
712 cdn.com/S1535610815003372/1-s2.0-S1535610815003372-main.pdf?\\_tid=19dea9c0-  
713 c082-11e5-b355-00000aab0f6c&acdnat=1453410251\\_dc740c5cfa231bc1453083e6fc7f7fec](http://ac.els-cdn.com/S1535610815003372/1-s2.0-S1535610815003372-main.pdf?_tid=19dea9c0-c082-11e5-b355-00000aab0f6c&acdnat=1453410251_dc740c5cfa231bc1453083e6fc7f7fec)
- 714 46. Su X, Malouf GG, Chen Y, Zhang J, Yao H, Valero V, et al. Comprehensive analysis of  
715 long non-coding RNAs in human breast cancer clinical subtypes. *Oncotarget [Internet]*.

- 716 2014;5(20):9864–76. Available from:  
717 [http://www.pubmedcentral.nih.gov/articlerender.fcgi?artid=4259443&tool=pmcentrez&ren](http://www.pubmedcentral.nih.gov/articlerender.fcgi?artid=4259443&tool=pmcentrez&rendertype=abstract)  
718 [dertype=abstract](http://www.pubmedcentral.nih.gov/articlerender.fcgi?artid=4259443&tool=pmcentrez&rendertype=abstract)
- 719 47. Koboldt DC, Fulton RS, McLellan MD, Schmidt H, Kalicki-Veizer J, McMichael JF, et al.  
720 Comprehensive molecular portraits of human breast tumours. *Nature* [Internet].  
721 2012;490(7418):61–70. Available from:  
722 [http://www.pubmedcentral.nih.gov/articlerender.fcgi?artid=3465532&tool=pmcentrez&ren](http://www.pubmedcentral.nih.gov/articlerender.fcgi?artid=3465532&tool=pmcentrez&rendertype=abstract)  
723 [dertype=abstract](http://www.pubmedcentral.nih.gov/articlerender.fcgi?artid=3465532&tool=pmcentrez&rendertype=abstract)
- 724 48. Broad lincRNA annotations.
- 725 49. Boone DN, Qi Y, Li Z, Hann SR. Egr1 mediates p53-independent c-Myc-induced  
726 apoptosis via a noncanonical ARF-dependent transcriptional mechanism. *Proc Natl Acad*  
727 *Sci U S A* [Internet]. 2011;108(2):632–7. Available from:  
728 [http://www.pubmedcentral.nih.gov/articlerender.fcgi?artid=3021028&tool=pmcentrez&ren](http://www.pubmedcentral.nih.gov/articlerender.fcgi?artid=3021028&tool=pmcentrez&rendertype=abstract)  
729 [dertype=abstract](http://www.pubmedcentral.nih.gov/articlerender.fcgi?artid=3021028&tool=pmcentrez&rendertype=abstract)
- 730

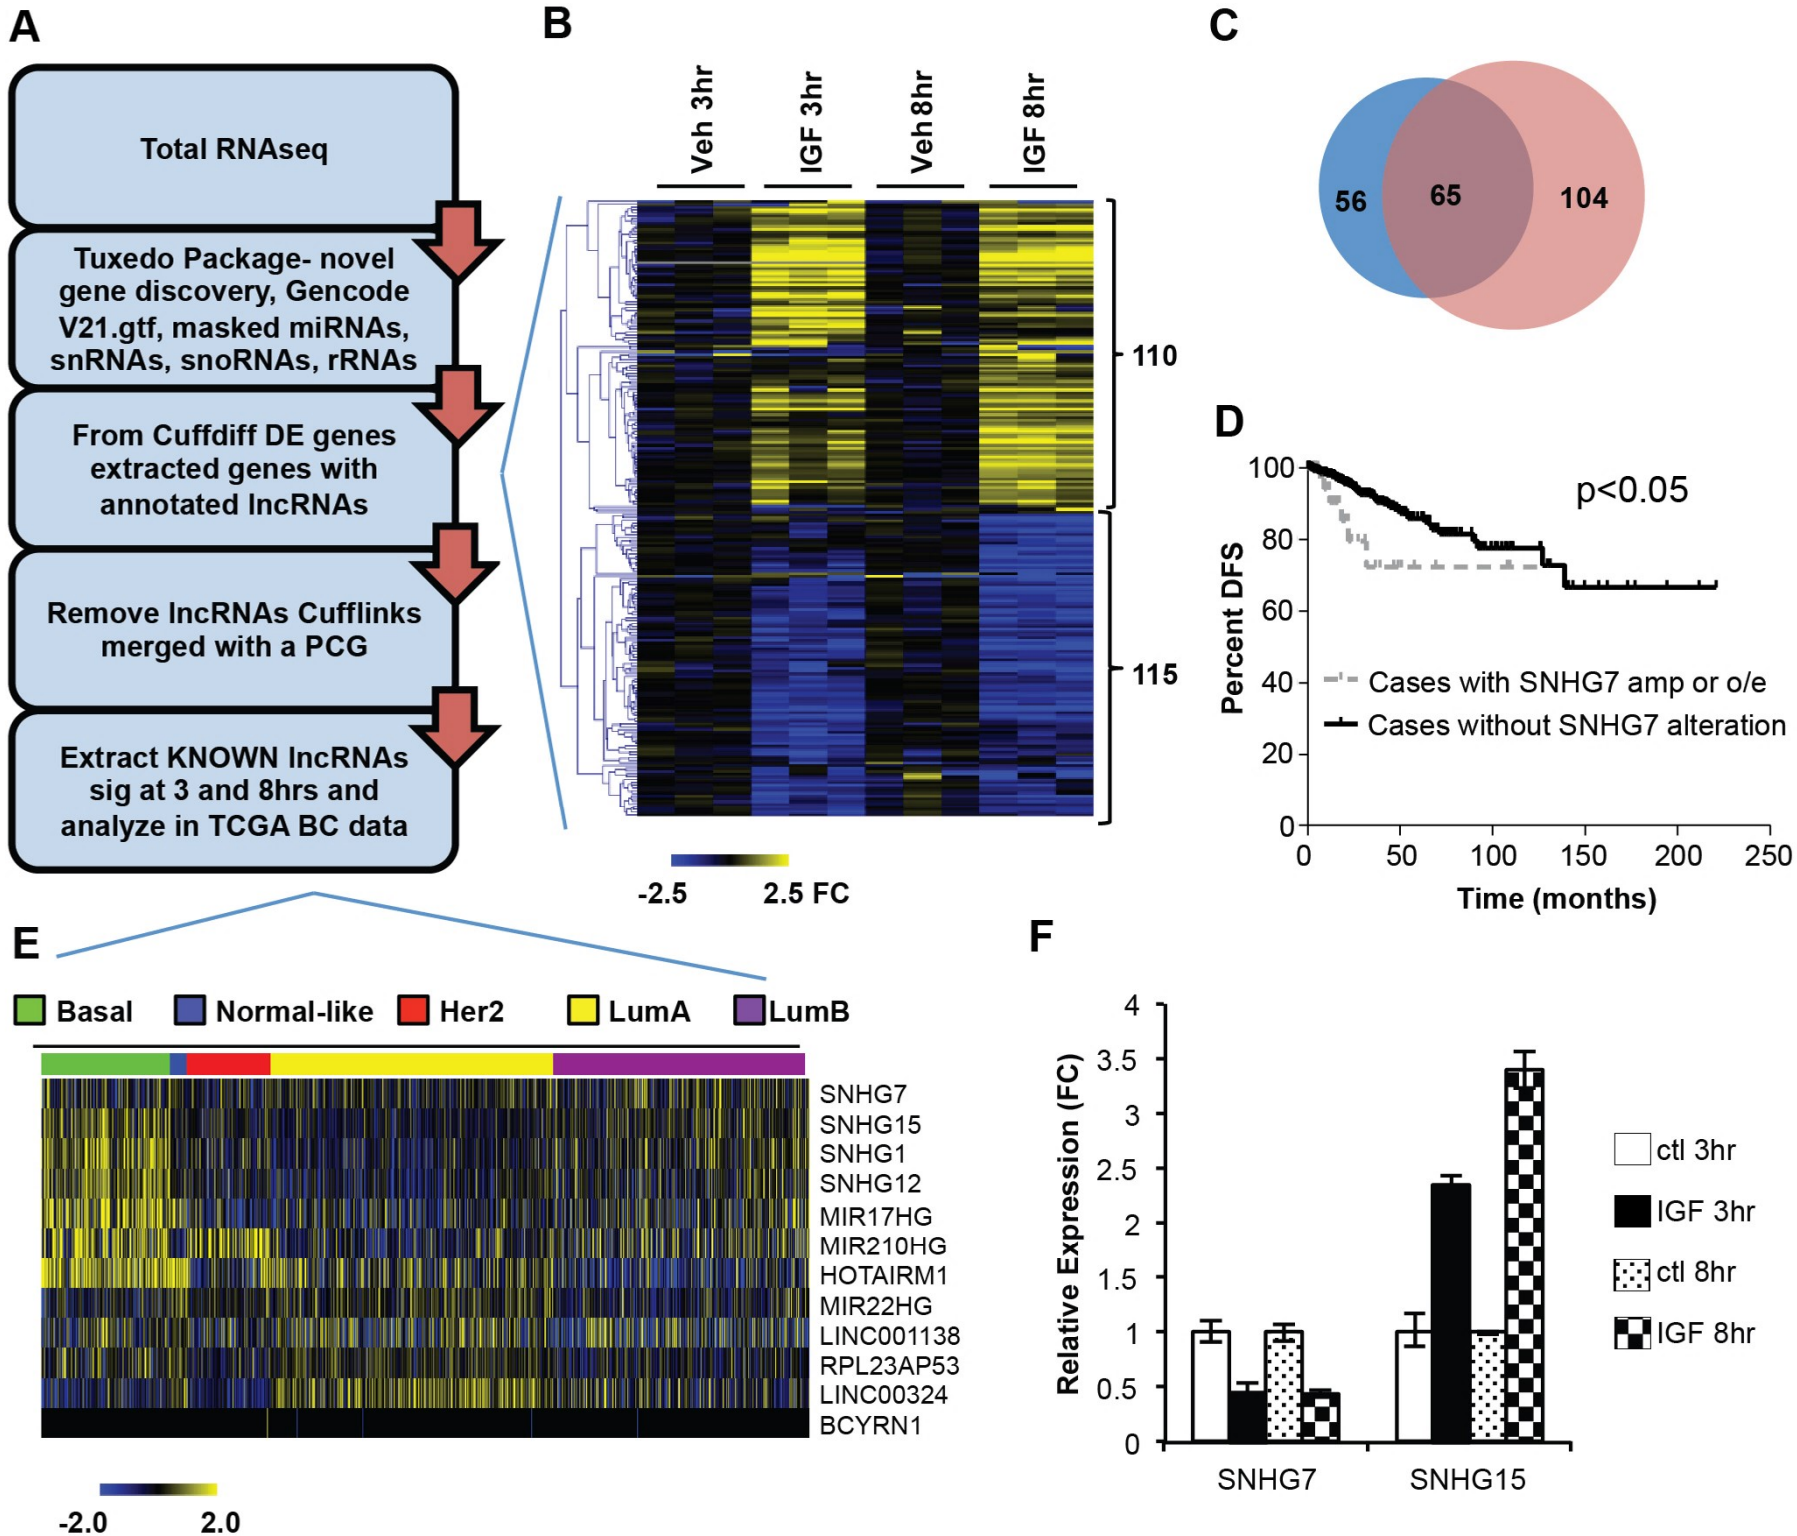



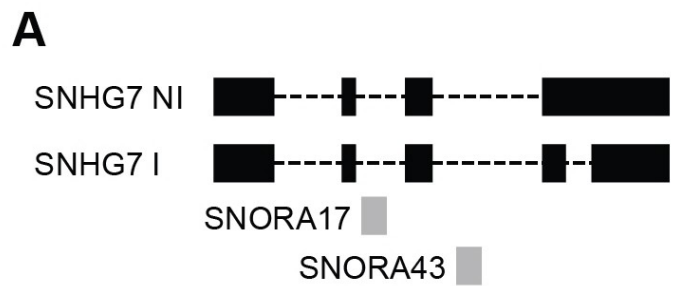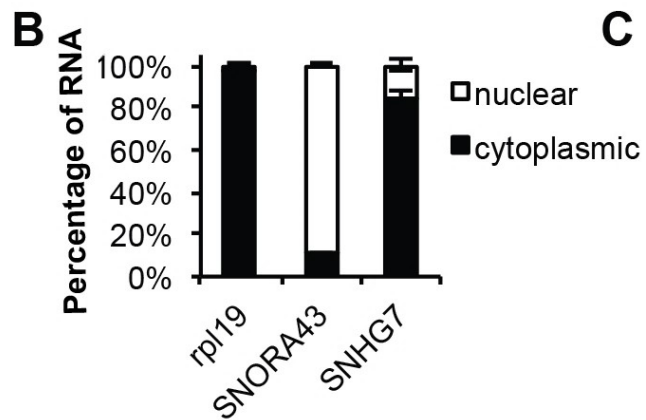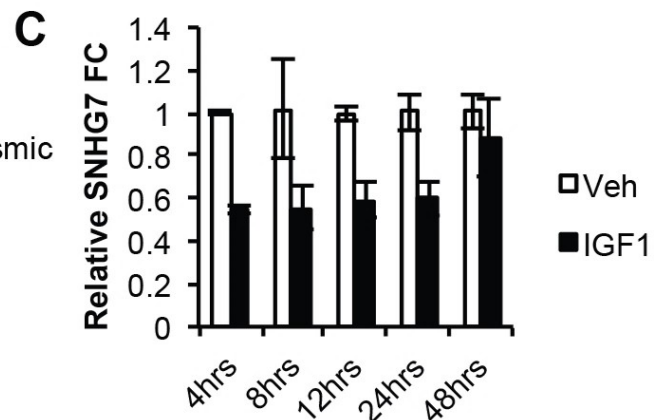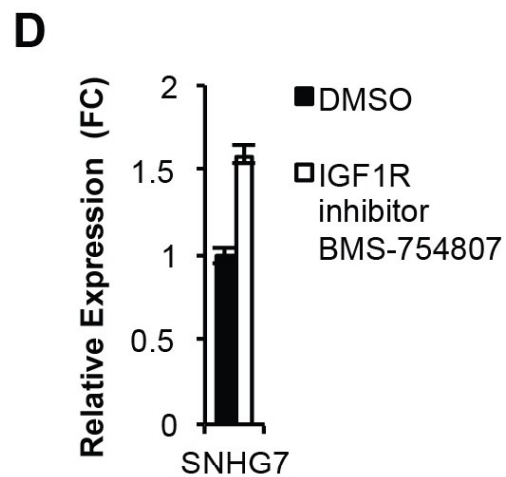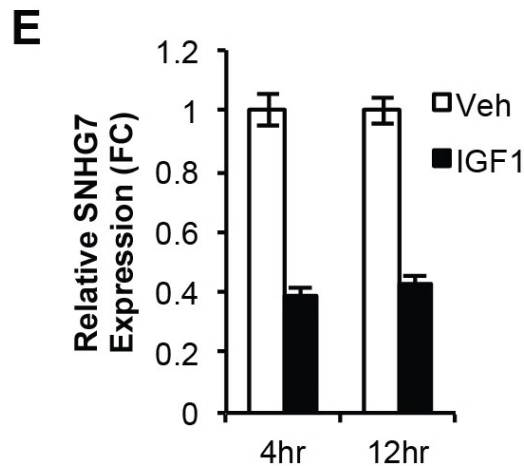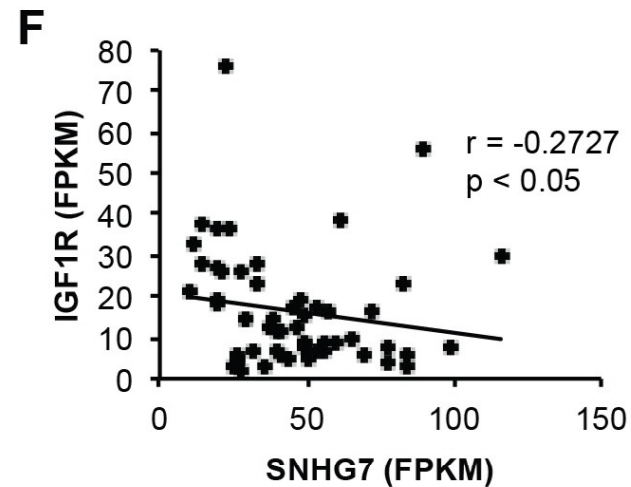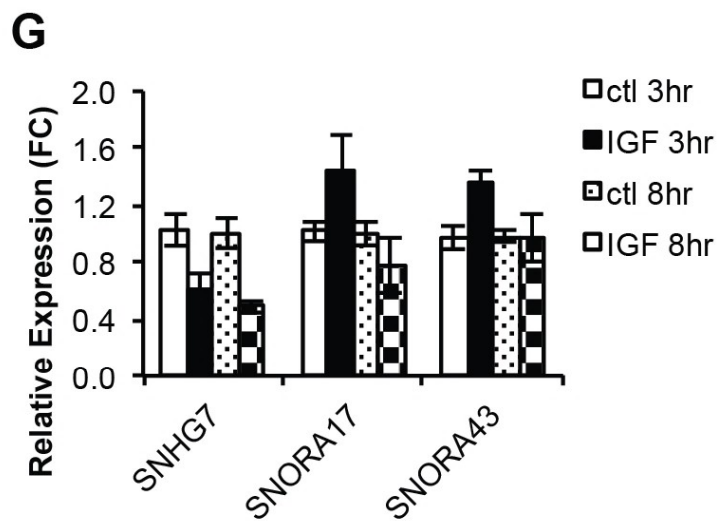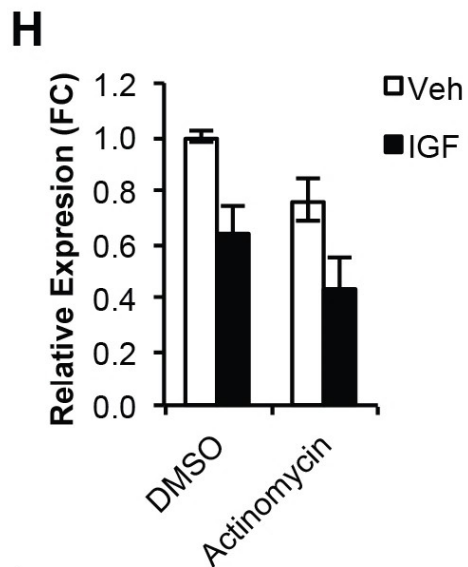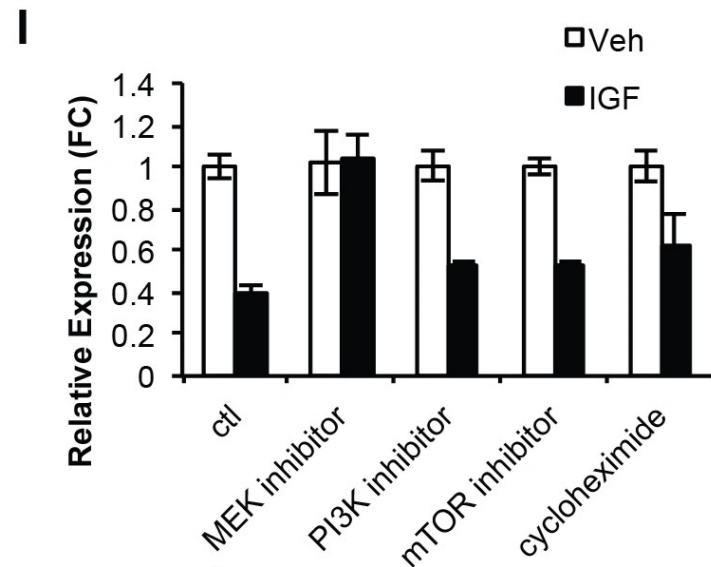

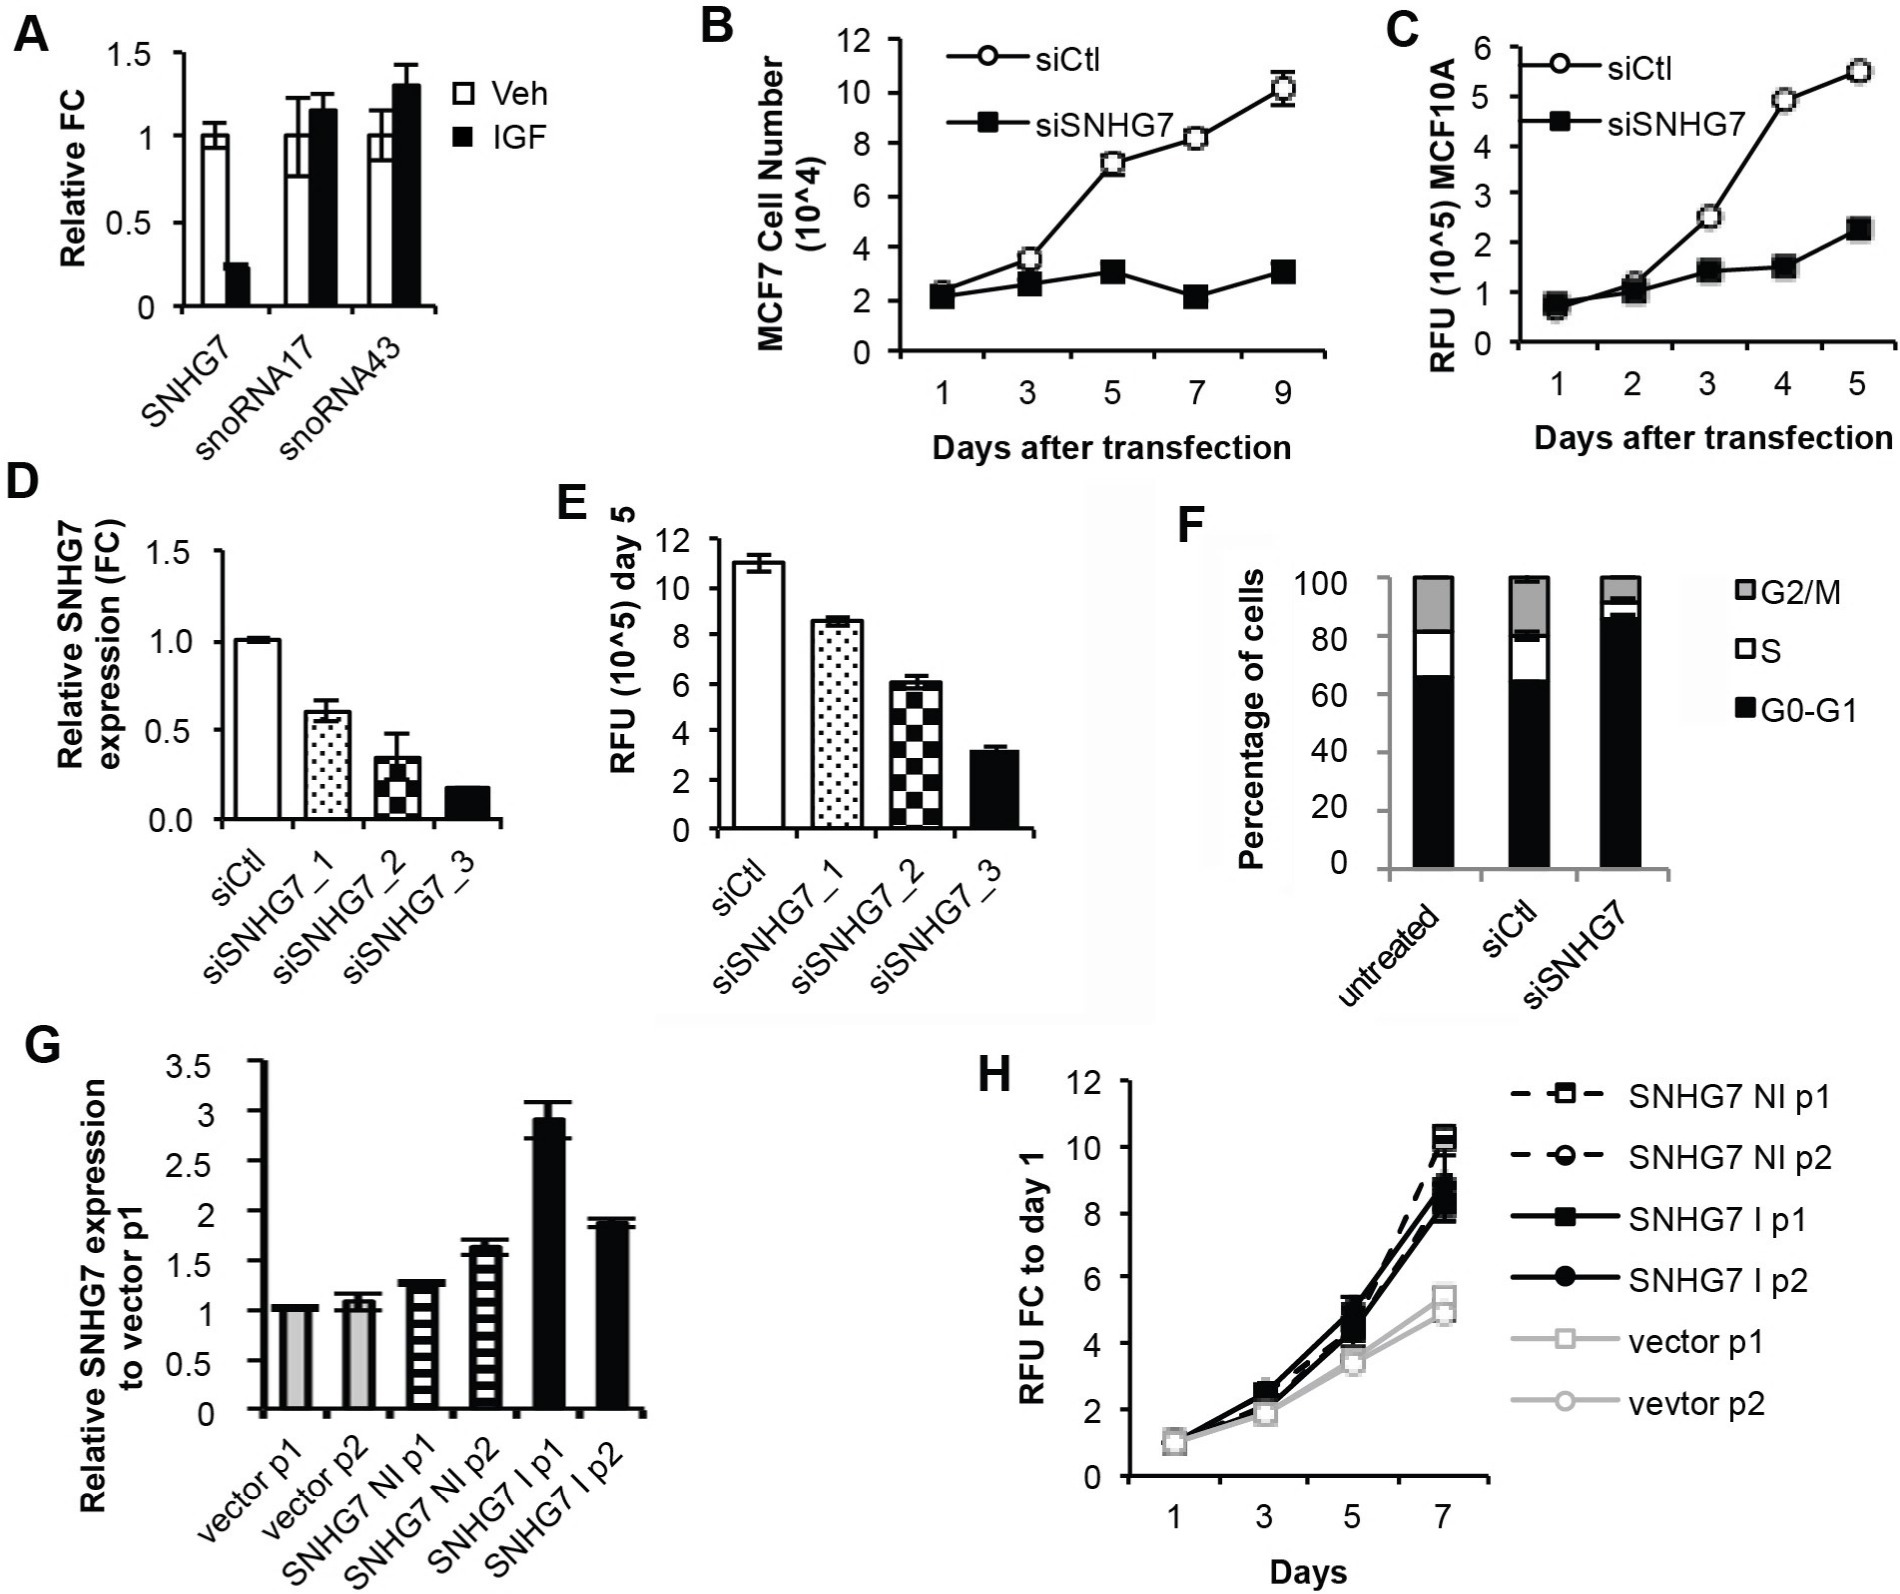

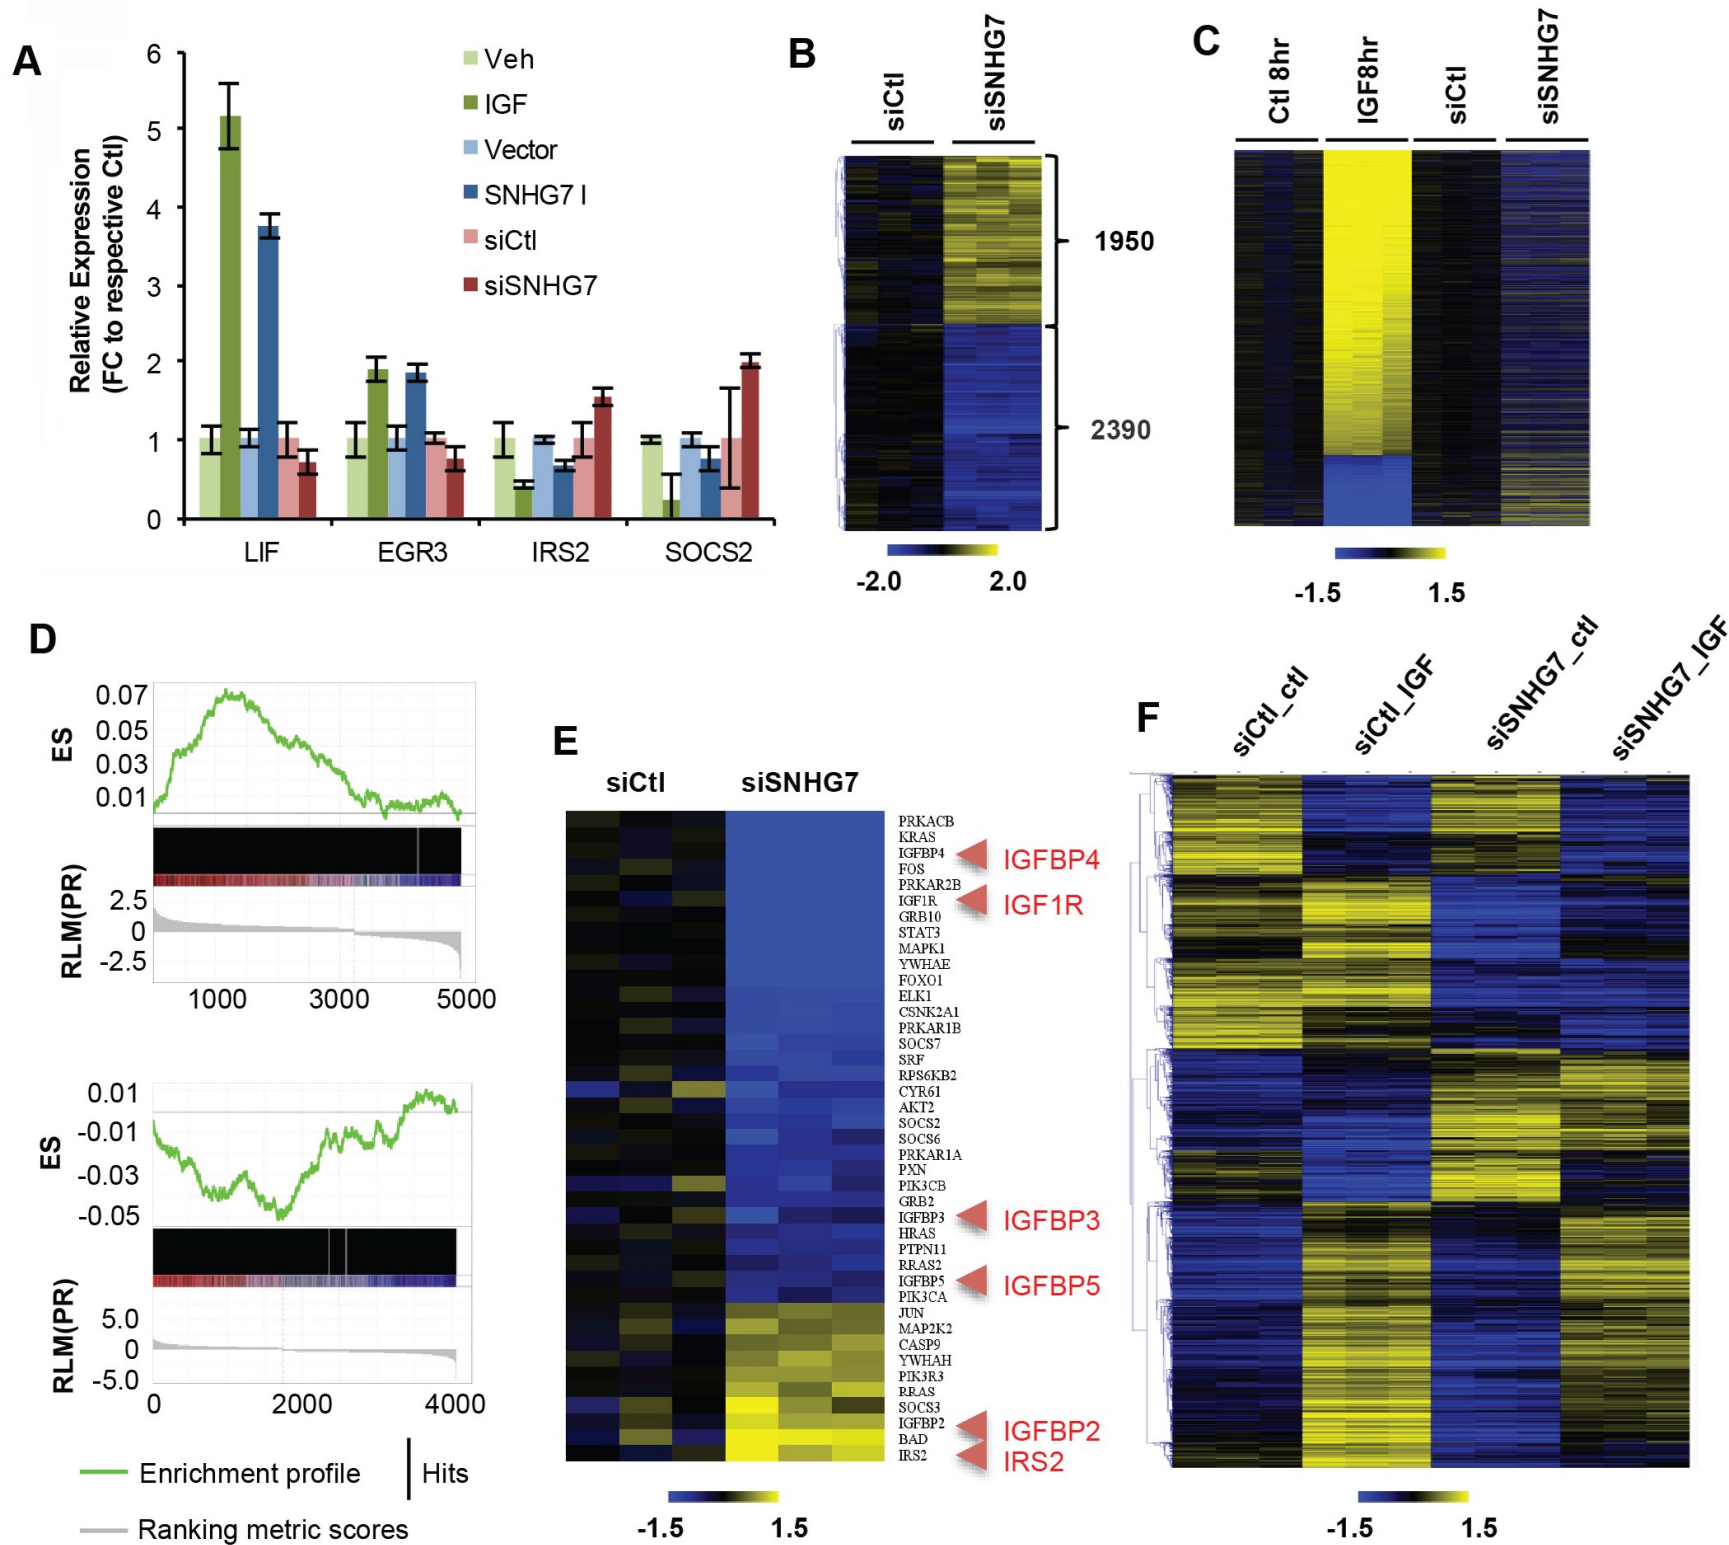

## Steady State

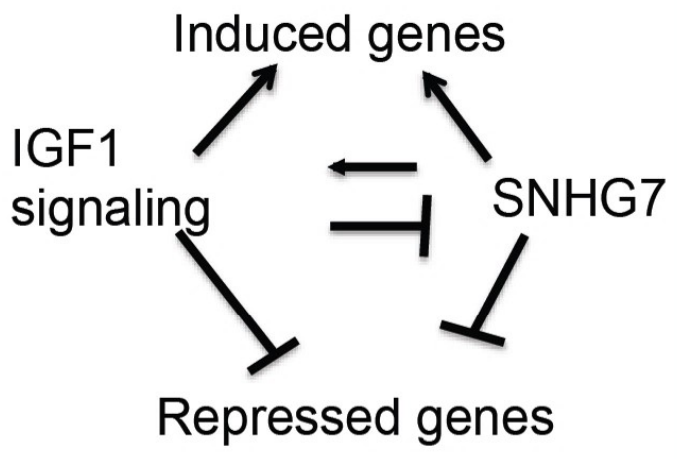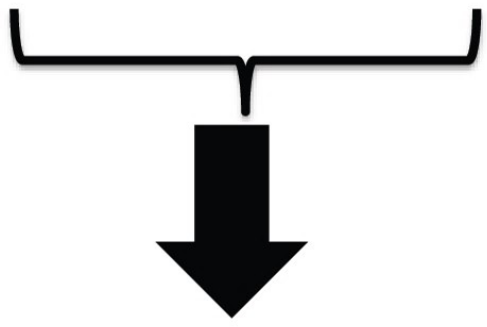

Steady state  
Proliferation

## IGF1 stimulation

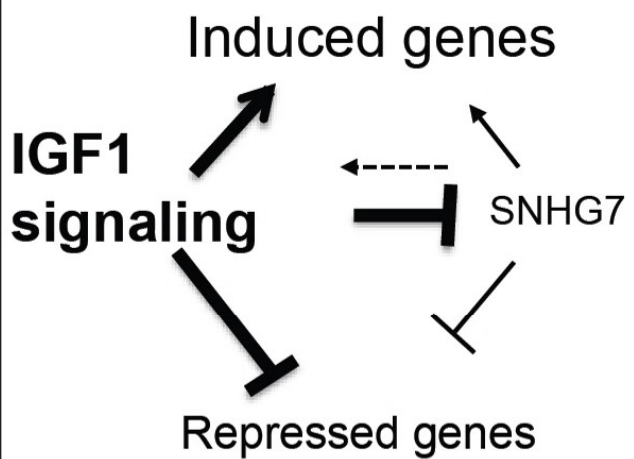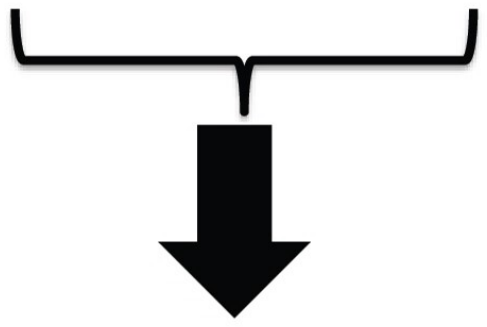

**Proliferation**

## SNHG7 overexpression

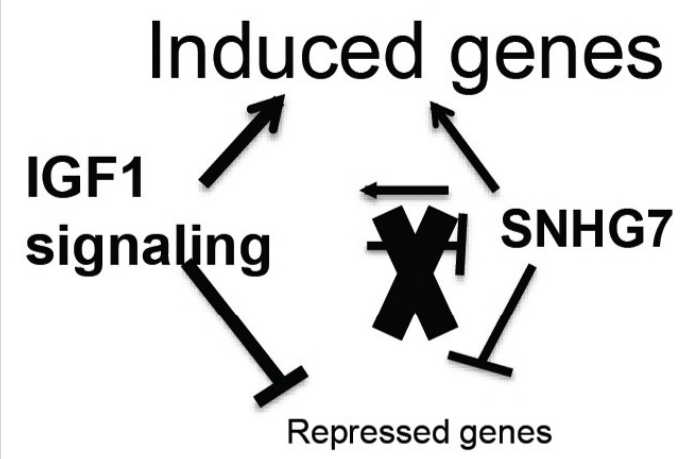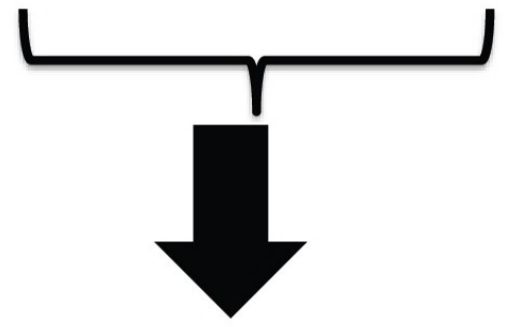

**Hyper-  
Proliferation**

| <b>IncRNA</b>    | <b>Avg.FPKM</b> | <b>FC3hr</b> | <b>FC8hr</b> | <b>TCGA BC<br/>%altered</b> | <b>TCGA BC<br/>survival</b> |
|------------------|-----------------|--------------|--------------|-----------------------------|-----------------------------|
| <b>SNHG7</b>     | 63.94           | -1.37        | -1.78        | 5                           | yes                         |
| <b>SNHG1</b>     | 49.98           | 1.63         | 1.69         | 8                           | no                          |
| <b>SNHG15</b>    | 17.62           | 2.75         | 3.10         | 7                           | no                          |
| <b>HOTAIRM1</b>  | 16.09           | -2.22        | 5.08         | 2                           | no                          |
| <b>BCYRN1</b>    | 5.85            | 1.95         | 2.33         | 2                           | no                          |
| <b>LINC01138</b> | 5.56            | 2.11         | 1.94         | 0                           | no                          |
| <b>MIR22HG</b>   | 5.19            | 3.20         | 2.27         | 3                           | no                          |
| <b>MIR210HG</b>  | 3.30            | 2.35         | 3.09         | 1                           | no                          |
| <b>LINC00324</b> | 2.35            | 2.35         | 2.06         | 2                           | no                          |
| <b>SNHG12</b>    | 11.18           | 1.57         | 1.64         | 4                           | no                          |
| <b>MIR17HG</b>   | 3.02            | 2.41         | 2.42         | 5                           | no                          |
| <b>RPL23AP53</b> | 1.48            | 1.43         | 1.45         | 14                          | no                          |
